1 **Trait components of whole plant water use efficiency are defined by unique,**  
2 **environmentally responsive genetic signatures in the model C<sub>4</sub> grass *Setaria***

3

4 Max J. Feldman<sup>1</sup>, Patrick Z. Ellsworth<sup>2</sup>, Noah Fahlgren<sup>1</sup>, Malia A. Gehan<sup>1</sup>, Asaph B.  
5 Cousins<sup>2</sup> and Ivan Baxter<sup>1,3,\*</sup>

6

7 \*Corresponding author

8 E-mail: [ivan.baxter@ars.usda.gov](mailto:ivan.baxter@ars.usda.gov) (IB)

9

10 <sup>1</sup>Donald Danforth Plant Science Center, St. Louis, Missouri, USA

11 <sup>2</sup>School of Biological Sciences, Washington State University, Pullman, Washington,  
12 USA

13 <sup>3</sup>USDA-ARS, Plant Genetics Research Unit, St. Louis, Missouri, USA

14

15 One sentence summary: Regulation of plant growth can be partitioned into water  
16 dependent and water independent processes controlled by unique genetic  
17 components.

18

19 **ABSTRACT**

20 Plant growth and water use are interrelated processes influenced by the  
21 genetic control of both plant morphological and biochemical characteristics.  
22 Improving plant water use efficiency (WUE) to sustain growth in different  
23 environments is an important breeding objective that can improve crop yields and  
24 enhance agricultural sustainability. However, genetic improvements of WUE using  
25 traditional methods have proven difficult due to low throughput and environmental  
26 heterogeneity encountered in field settings. To overcome these limitations the study  
27 presented here utilizes a high-throughput phenotyping platform to quantify plant  
28 size and water use of an interspecific *Setaria italica* x *Setaria viridis* recombinant  
29 inbred line population at daily intervals in both well-watered and water-limited  
30 conditions. Our findings indicate that measurements of plant size and water use in  
31 this system are strongly correlated; therefore, a linear modeling approach was used

32 to partition this relationship into predicted values of plant size given water use and  
33 deviations from this relationship at the genotype level. The resulting traits  
34 describing plant size, water use and WUE were all heritable and responsive to soil  
35 water availability, allowing for a genetic dissection of the components of plant WUE  
36 under different watering treatments. Linkage mapping identified major loci  
37 underlying two different pleiotropic components of WUE. This study indicates that  
38 alleles controlling WUE derived from both wild and domesticated accessions of the  
39 model C<sub>4</sub> species *Setaria* can be utilized to predictably modulate trait values given a  
40 specified precipitation regime.

41

## 42 **INTRODUCTION**

43 Improving crop productivity while simultaneously reducing agricultural  
44 water input is essential to ensure the security of our global food supply and protect  
45 our diminishing fresh water resources. Agriculture is by far the greatest industrial  
46 consumer of fresh water, largely because productivity losses related to drought  
47 stress can decrease crop yields by greater than 50% (Boyer, 1982; Hamdy et al.,  
48 2003). Addressing these challenges will require an integrated approach that  
49 combines irrigation practices that minimize water loss and deployment of crop  
50 plants with superior water use efficiency (Boutraa, 2010; Davies and Bennett, 2015;  
51 Evans and Sadler, 2008; Gregory and George, 2011; Morison et al., 2008; Stanhill,  
52 1986).

53 Plant water use efficiency (WUE) can be broadly defined as the ratio of  
54 biomass produced to total water lost by the plant (Bacon, 2009; Blum, 2009;  
55 Condon, 2004; Evans and Sadler, 2008; Monteith, 1993; Morison et al., 2008;  
56 Tardieu, 2013). This complex trait is determined by many factors including  
57 photosynthetic carbon assimilated per unit of water transpired (Condon et al., 2002;  
58 Farquhar et al., 1989; Morison et al., 2008; Penman and Schofield, 1951; Seibt et al.,  
59 2008), leaf architecture (Brodribb et al., 2007; Sack and Holbrook, 2006), stomata  
60 characteristics (Franks and Farquhar, 2006; Lawson and Blatt, 2014), epidermal  
61 wax content (Premachandra et al., 1994), canopy and root architecture (White and

62 Snow, 2012; Martre et al., 2001), stomatal dynamics (Blatt, 2000; Hetherington and  
63 Woodward, 2003; Lawson et al., 2010; Flood et al., 2011; Lawson et al., 2012) ,  
64 hydraulic transport (Edwards et al., 2012; Holloway-Phillips and Brodribb, 2011),  
65 portion of carbon lost from respiration (Escalona et al., 2012; Tomás et al., 2014)  
66 and partitioning of photo-assimilate (Carmo-Silva et al., 2009; Chaves, 1991). Given  
67 that plant species (Stewart et al., 1995; Winter et al., 2005; Zegada-Lizarazu and  
68 Iijima, 2005; Zhou et al., 2012) and ecotypes within species (Kenney et al., 2014;  
69 Lopez et al., 2015; Nakhforoosh et al., 2016; Pater et al., 2017; Ryan et al., 2016; Xu  
70 et al., 2009) exhibit variation in WUE it is likely that the characteristics which  
71 determine this trait are under genetic control and have evolved in response to  
72 different environmental conditions such as water availability (Assouline and Or,  
73 2013; Brodribb et al., 2009; Huxman et al., 2004). Therefore, WUE is likely  
74 influenced by both genetically encoded developmental programs and changes in  
75 growth environments throughout the plant lifecycle (Fleury et al., 2010).

76         The technical challenges associated with measuring plant size and  
77 transpiration in large structured genetic populations has historically limited  
78 experimental efforts aimed at identifying the genetic components associated with  
79 WUE. This is particularly difficult in field settings due to year-to-year climate  
80 fluctuation and micro-environmental variation observed within agricultural fields.  
81 The advent of controlled environment, high-throughput phenotyping instruments  
82 (Chen et al., 2014; Fahlgren et al., 2015; Granier et al., 2006; Pereyra-Irujo et al.,  
83 2012; Reuzeau et al., 2006; Sadok et al., 2007; Tisné et al., 2013; Walter et al., 2007)  
84 alleviates many of these challenges through stringent control of climatic variables  
85 and automated, high-resolution measurement of plant size and evapotranspiration  
86 across large breeding populations.

87         Evidence from studies conducted on both crop and model plants indicate that  
88 the traits associated with WUE are heritable and largely polygenic, although  
89 identifying the causal locus associated with differential performance has proven  
90 difficult in crop plants due to plant size and genome complexity (Adiredjo et al.,  
91 2014; Aparna et al., 2015; Chen et al., 2012; Coupel-Ledru et al., 2016; Honsdorf et

92 al., 2014; Parent et al., 2015; Schoppach et al., 2016; Xu et al., 2009). Utilization of  
93 model plants ( $C_3$  annuals *Arabidopsis thaliana* and *Brachypodium distachyon*) that  
94 possess tractable genetic and experimental properties has enabled scientists to  
95 identify QTL that contribute to WUE (Des Marais et al., 2016; Easlon et al., 2014;  
96 Lowry et al., 2013; Mojica et al., 2016; Vasseur et al., 2014), a few of which have  
97 been mapped to causal genes (Ruggiero et al., 2017). Species in the genus *Setaria*  
98 also possess many of these desirable qualities and can be used as experimental  
99 models to identify genetic components associated with WUE in a  $C_4$  plant that is  
100 closely related evolutionarily to  $C_4$  crops like maize, sorghum and bioenergy grasses  
101 (Bennetzen et al., 2012; Brutnell et al., 2010; Huang et al., 2016; Li and Brutnell,  
102 2011; Zhu et al., 2017). However, in order to study the diversity of resource  
103 utilization tactics present in natural and mapping populations of *Setaria* (Saha et al.,  
104 2016) or other  $C_4$  plant species, methods to quantify plant performance and WUE  
105 in different environments must be developed.

106 The objectives of this study were to use a controlled environment high-  
107 throughput phenotyping system to characterize the genetic architecture of plant  
108 size, water use and WUE in an interspecific *Setaria* recombinant inbred population  
109 (RIL) under two different watering regimes. Our findings indicate that plant size,  
110 water use and WUE are polygenic traits which are influenced by both soil water  
111 content and greater than 10 pleiotropic loci whose effect size changes differentially  
112 throughout development. In addition, we identify and discuss several aspects of  
113 experimental design that should be considered when performing high-throughput  
114 phenomics experiments to study plant WUE.

115

## 116 **MATERIALS AND METHODS**

### 117 *Plant material and growth conditions*

118 The experiment here was first described in (Feldman et al., 2017), which  
119 focused on plant height, and the details are paraphrased here in quotes for clarity.  
120 An interspecific *Setaria* F7 RIL population comprised of 189 genotypes (1138  
121 individuals) was used for genetic mapping. The RIL population was generated  
122 through a cross between the wild-type green foxtail *S. viridis* accession, A10, and the

123 domesticated *S. italica* foxtail millet accession, B100 (Bennetzen et al., 2012; Devos  
124 et al., 1998; Wang et al., 1998). After a six-week stratification in moist long fiber  
125 sphagnum moss (Luster Leaf Products Inc., USA) at 4°C, *Setaria* seeds were planted  
126 in 10 cm diameter white pots pre-filled with ~470 cm<sup>3</sup> of Metro-Mix 360 soil  
127 (Hummert, USA) and 0.5 g of Osmocote Classic 14-14-14 fertilizer (Everris, USA).  
128 After planting, seeds were given seven days to germinate in a Conviron growth  
129 chamber with long day photoperiod (16 h day/8 h night; light intensity  
130 230 μmol/m<sup>2</sup>/s) at 31°C day/21°C night before being loaded onto the Bellwether  
131 Phenotyping System using a random block design replicating each genotype and  
132 treatment combination in triplicate. For each replicate, individual plants of the same  
133 genotype were grown side by side with one individual receiving unlimited water  
134 supply while the other individual was subjected to water limitation. The growth  
135 chamber location of each of these paired replicates was randomly assigned and did  
136 not vary during the course of the experiment. Plants were grown on the system for  
137 25 days under long day photoperiod (16 h day/8 h night; light intensity 500  
138 μmol/m<sup>2</sup>/s) with the same temperature regime used during germination. Relative  
139 humidity was maintained between 40 – 80 %. Gravimetric estimation of pot weight  
140 was performed 2-3 times per day and water was added to maintain soil volumetric  
141 water content at either 33% full-capacity (FC) (water-limited) or 100% FC (well-  
142 watered) as determined by (Fahlgren et al., 2015). Prescribed soil water content  
143 across both treatment blocks was achieved by 15 days after planting (DAP).

144 The volume of water transpired by individual plants at each pot weighing  
145 was calculated as the difference between the measured pot weight and the weight of  
146 the pre-filled pot at pot capacity (100% FC) or the difference between current pot  
147 weight and the previous weight measurement if no water was added. At the  
148 conclusion of each weighing, if the pot weight was below the set point, water was  
149 added to the pot to return soil water content back to its target weight. This strategy  
150 effectively maintains soil moisture content at a consistent level within both  
151 treatment blocks. To evenly establish seedlings before the water limitation  
152 treatment began, equal volumes of water (100% FC) were added to all pots for two  
153 days after transfer to the system. At 10 DAP, a dry down phase was initiated (no

154 watering) to establish the water-limited treatment block (40% FC) while continuing  
155 to maintain a soil water content of 100% FC within the well-watered treatment  
156 block.

157

### 158 *Image acquisition and derived measurements*

159 RGB images of individual plants were acquired using a top-view and a side-  
160 view cameras at four different angular rotations (0°, 90°, 180°, 270°) every other day  
161 at the Bellwether Phenotyping Facility (Fahlgren et al., 2015). Optical zoom was  
162 adjusted throughout the experiment to ensure accurate quantification of traits  
163 throughout plant development. The unprocessed images and the details of the  
164 configuration settings can be found at the following download site:

165 ([https://plantcv.danforthcenter.org/pages/data-sets/setaria\\_height.html](https://plantcv.danforthcenter.org/pages/data-sets/setaria_height.html)).

166 Plant objects were extracted from images and analyzed using custom PlantCV  
167 Python scripts specific to each camera (side-view or top-view), zoom level, and lifter  
168 height ([https://github.com/maxjfeldman/Feldman\\_Elsworth\\_Setaria\\_WUE\\_2017](https://github.com/maxjfeldman/Feldman_Elsworth_Setaria_WUE_2017)).  
169 Scaling factors relating pixel area and distance to ground truth measurements  
170 calculated by (Fahlgren et al., 2015) were used to translate pixels to relative area  
171 (pixels/cm<sup>2</sup>) and relative distance (pixels/cm).

172

### 173 *Biomass estimation*

174 At the conclusion of the experiment, 176 individual plants (91 plants from  
175 the 100% FC and 85 from the 40% FC) were harvested to measure aboveground  
176 biomass. Gravimetric measurement of fresh weight and saturated fresh weight were  
177 taken directly upon tissue harvest after which plant tissue was placed into  
178 polypropylene micro-perforated bags (PJP MarketPlace #361001), dried for three  
179 days at 60 °C and subsequently weighed to determine dry weight biomass.

180 Multivariate linear regression was used to evaluate, select and calibrate a predictive  
181 model to estimate both fresh and dry weight plant biomass.

182 Regressing plant fresh weight biomass as a function of side-view area,  
183 perimeter length, height, object solidity and width indicated that each of these terms  
184 is a significant predictor of fresh weight biomass after stepwise model selection

185 using Akaike's Information Criterion (AIC) (Bozdogan, 1987); multiple  $R^2 = 0.89$ ).  
186 Unlike fresh weight biomass, side-view area, width, and height were the only  
187 significant terms used for prediction of dry weight biomass after using the AIC  
188 stepwise model selection correction procedure (multiple  $R^2 = 0.76$ ). Models  
189 containing all significant terms and their interaction achieved a greater model fit,  
190 but they introduced artifacts at earlier developmental time points due to model  
191 over-fitting (Fig. S1). Generally, models constructed to estimate fresh weight  
192 biomass in the well-watered treatment block exhibited greater explanatory power  
193 than those constructed to predict dry weight biomass or those in water-limited  
194 treatment blocks (Fig. 1).

195 A minimal model containing only the most significant term (side-view area)  
196 in both fresh and dry weight models produced a goodness of fit similar to more  
197 complex models (fresh weight  $R^2 = 0.86$ ; dry weight  $R^2 = 0.74$ ). To avoid  
198 propagation of error, values that incorporated plant fresh weight biomass were  
199 calculated based on adjusted side-view pixel area and translated to fresh weight  
200 biomass after analysis. Cumulative biomass values calculated on a genotype within  
201 treatment basis were interpolated using loess smoothing (Chambers and Hastie,  
202 1992). Plant size accumulation on a per day basis was calculated as the difference  
203 between the loess fit values on a given day and the estimates from the previous day.

204

#### 205 *Water loss tabulation*

206 The LemnaTec instrument at the Bellwether Phenotyping Facility provided  
207 measurements of water use based upon the gravimetric weight of each pot before  
208 watering, the volume of water applied, and the resulting weight after watering. On  
209 days when the volume of water added to a pot was greater than zero, the daily  
210 volume of water added was the sum of water volume added over a single calendar  
211 day. On days when water was not added (e.g. during the dry down period), the  
212 water volume was calculated as the minimum gravimetric weight of the pot on the  
213 day in question subtracted from the minimum weight value from the previous day.  
214 The cumulative volume of water used on a specific day was the sum of all water  
215 used prior to that day. By fifteen days after planting (DAP), the dry down phase for



216 the water-limited treatment group was complete and pots containing plants lost  
217 substantially more water than their empty pot counterparts in the well-watered  
218 treatment group (Fig. 1). This observation indicates pot water loss cannot be  
219 considered a proximity measure of total plant transpiration before day 15 in this  
220 experiment (Fig. 1). Examination of the ratio between fresh weight biomass  
221 accumulated relative to the amount of water used and mathematical prediction of  
222 the amount of water used per day over this period suggests that the amount of  
223 water used between day 15 and 17 can be used as an approximation of cumulative  
224 water transpired by the plant throughout this experiment up to this point (Fig. S2).  
225 This data and the observation that at day 17 the plants are still relatively small (less  
226 than 8% of their maximum size on average) support the rationale of starting the  
227 analysis on this day (Fig. 1). Volumes of water use (daily and cumulative) on a  
228 genotype within treatment basis were estimated using loess smoothing.

229

### 230 *Heritability and trait variance partitioning*

231 We used the same approach as in (Feldman et al., 2017) and the details are  
232 paraphrased here in quotes for clarity. During this experiment, plant area was  
233 measured every other day, so the number of replicates per treatment to calculate  
234 broad sense heritability on any given day was limited. To alleviate this technical  
235 shortcoming, trait values for each individual were interpolated across missing days  
236 using loess smoothing.

237 Variance components corresponding to broad sense heritability and total  
238 variance explained was estimated using a mixed linear model using the R package  
239 lme4 (Bates et al., 2015). Broad sense heritability was calculated using two  
240 methods. Within an individual experiment, broad sense heritability on a line-  
241 estimate basis was calculated using the following formula:

242

243 Equation 1:

$$244 \quad H^2_{\text{experiment}} = \sigma^2_{\text{genotype}} / (\sigma^2_{\text{genotype}} + (\sigma^2_{\text{genotype} \times \text{treatment}} / n_{\text{treatment}}) + (\sigma^2_{\text{residual}} /$$

245  $n_{\text{replicates}}))$



246

247 in which  $n_{\text{treatment}}$  is the harmonic mean of the number of treatment blocks in which  
248 each line was observed and  $n_{\text{replicates}}$  is the harmonic mean of number of replicates of  
249 each genotype in the experiment. Heritability within treatment blocks was  
250 calculated by fitting a linear model with genotype as the only explanatory factor  
251 within each treatment block.

252

253 Equation 2:

$$254 \quad H^2_{\text{treatment block}} = \sigma^2_{\text{genotype}} / \sigma^2_{\text{total variance}}$$

255

256 The proportion of variance attributed to genotype divided by total variance  
257 within each treatment block is reported as broad sense heritability within treatment  
258 (equation). Total variance explained was calculated by fitting a linear model  
259 including factors, genotype, treatment, plot and genotype x treatment effects across  
260 all phenotypic values in all treatments. The proportion of variance that is  
261 incorporated into these factors divided by the total variance in the experiment is  
262 reported as total variance explained for each factor.

263

264 *QTL analysis*

265 We used the same approach as in (Feldman et al., 2017) and the details are  
266 repeated here in quotes for clarity. "QTL mapping was performed at each time point  
267 within treatment blocks and on the numerical difference, relative difference and  
268 trait ratio calculated between treatment blocks using functions encoded within the  
269 R/qtl and funqtl package (Broman et al., 2003; Kwak et al., 2016). The functions  
270 were called by a set of custom Python and R scripts  
271 ([https://github.com/maxjfeldman/foxy\\_qtl\\_pipeline](https://github.com/maxjfeldman/foxy_qtl_pipeline)). Two complimentary analysis  
272 methods were utilized. First, a single QTL model genome scan using Haley-Knott  
273 regression was performed to identify QTL exhibiting LOD score peaks greater than a  
274 permutation based significance threshold ( $\alpha = 0.05$ ,  $n = 1000$ ). Next, a stepwise  
275 forward/backward selection procedure was used to identify an additive, multiple

276 QTL model based upon maximization of penalized LOD score. Both procedures were  
277 performed at each time point, within treatment blocks and on the numerical  
278 difference relative difference and trait ratio calculated between phenotypic values  
279 measured in treatment blocks at each time point. QTL associated with difference or  
280 ratio composite traits may identify loci associated with genotype by environment  
281 interaction (Des Marais et al., 2013).

282 The function-valued approach described by (Kwak et al., 2016), was used to  
283 identify QTL associated with the average (SLOD) and maximum (MLOD) score at  
284 each locus throughout the experiment. Each genotypic mean trait within treatments  
285 was estimated using a logistic function, and the QTL significance threshold was  
286 determined based upon permutation-based likelihood of observing the empirical  
287 SLOD or MLOD test statistic. Separate, independent linkage mapping analysis  
288 performed at each time point identified a larger number of QTL locations relative to  
289 similar function valued analysis based on the SLOD and MLOD statistics calculated  
290 at each individual marker throughout the experimental time course.

291 After refinement of QTL position estimates, the significance of fit for the full multiple  
292 QTL model was assessed using type III analysis of variance (ANOVA). The  
293 contribution of individual loci was assessed using drop-one-term, type III ANOVA.  
294 The absolute and relative allelic effect sizes were determined by comparing the fit of  
295 the full model to a sub-model with one of the terms removed. All putative protein  
296 coding genes (*Setaria viridis* genome version 1.1) found within a 1.5-logarithm of  
297 the odds (LOD) confidence interval were reported for each QTL.”

298

## 299 **RESULTS**

300

### 301 *Measuring plant size and water use throughout the plant lifecycle*

302 Recurrent measurement of plant size and water use was performed on  
303 individuals of a *Setaria* recombinant inbred population (Devos et al., 1998; Devos et  
304 al., 1998) grown at two soil water content levels at the Bellwether Phenotyping  
305 Facility (Fahlgren et al., 2015). Images of each individual plant were captured every  
306 other day from 7 to 33 days after sowing and plant objects were isolated and

**Figure 1. Plant size and water use can be accurately inferred throughout a majority of the plant life cycle.**

A) Significant correlations between plant fresh weight and pixel area were observed in both the well-watered and water-limited treatment blocks. B) Plants exhibited a sigmoidal growth curve, characterized by an average maximal rate of growth between 23–26 days after planting. Green lines reflect absolute average size, whereas purple lines report on growth rate. Dark and lighter shaded lines report the well-watered and water-limited treatment blocks respectively. C) Daily water loss can be accurately measured at 17 days after planting. Dark blue and orange lines correspond to average daily water lost from pots, whereas the lines with lighter shades of similar colors report the average water loss of empty pots. The dashed black line denotes the day at which dry down within the water-limited treatment block is complete whereas the dashed red line demarks when water use can be accurately measured. D) By 17 days after planting, plants have attained less than 8% of their total biomass.

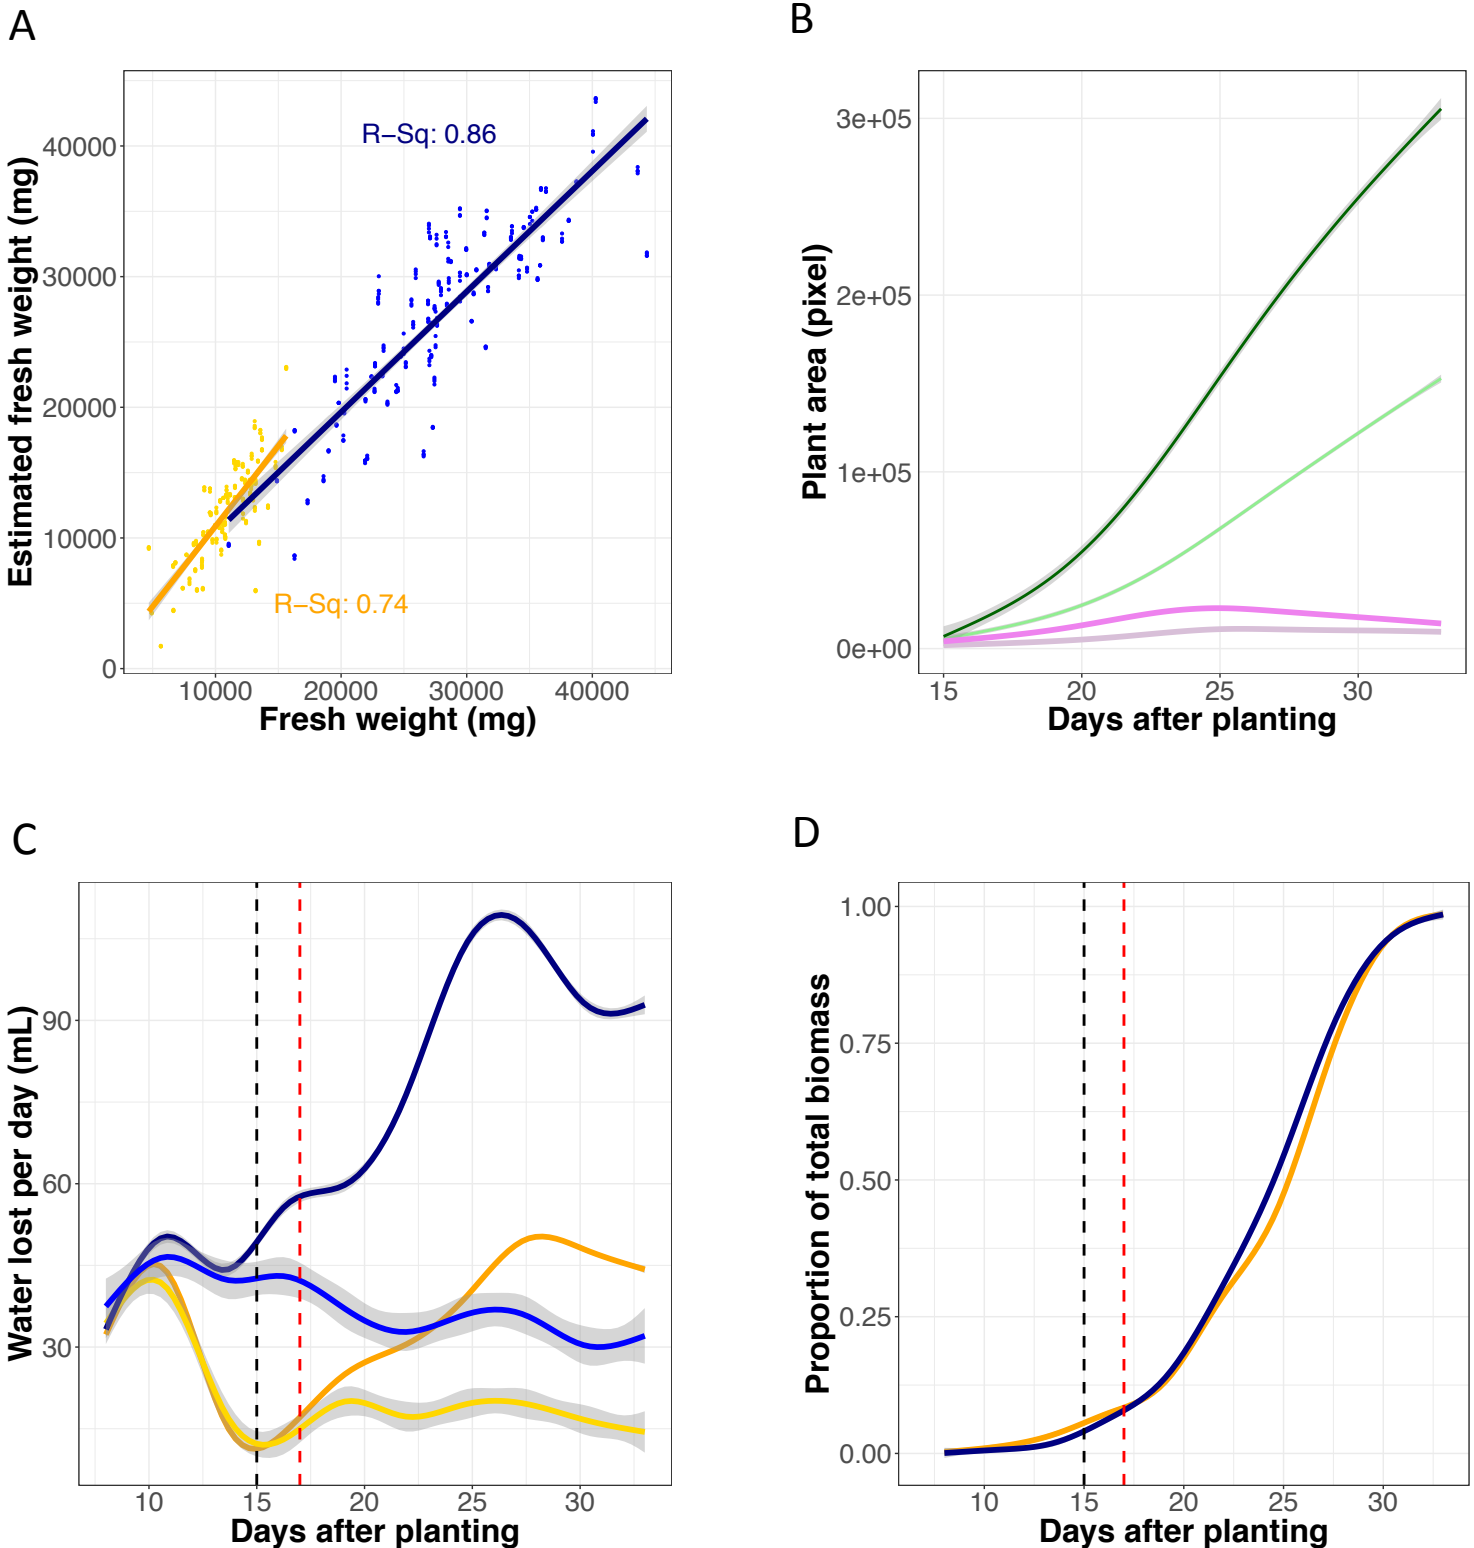

307 quantified using PlantCV (Fahlgren et al., 2015; Feldman et al., 2017). Weight  
308 estimates of fresh and dry-weight aboveground biomass were calculated using a  
309 simple linear model featuring side-view area as the only predictor (Fig. 1, Fig. S3).

310 Daily plant water use was inferred through gravimetric measurement of pot  
311 weight performed two to three times each day by the LemnaTec instrument. The  
312 amount of water used by individual plants was calculated as the difference between  
313 the measured weight of the pot and the weight of a pre-filled pot at a fixed point that  
314 is proportional to its water holding capacity (100% FC) or the difference between  
315 current weight and the previous weight measurement if no water was added. At the  
316 conclusion of each weighing event, if pot weight was below the set point, water was  
317 added to the pot to return it to the target weight value. This strategy effectively  
318 maintains soil moisture potential at a consistent level within both treatment blocks.  
319 To evenly establish seedlings before the water limitation treatment, equal volumes  
320 of water (100% FC) were added to all pots for two days after transfer onto the  
321 system. At 10 days after sowing, a dry down phase was initiated (no watering) to  
322 establish uniformity within the water-limited treatment block (40% FC) while  
323 continuing to maintain a soil water content of 100% FC within the well-watered  
324 treatment block.

325 Examination of water loss from empty pots relative to those containing  
326 plants suggested that early in the experiment a majority of water loss was  
327 exclusively due to evaporation from the soil surface and did not informatively  
328 report on plant transpiration (Fig. 1) (Ge et al., 2016). Beginning the analysis at day  
329 17 enabled us to minimize the artifacts of evaporation that dominated early in the  
330 experiment while still capturing growth attributes over a large proportion (~92%)  
331 of the plant growth within the experiment (Fig. 1). Another potential confounding  
332 issue was the use of a fixed set point for the pot weight, which neglected the  
333 increasing weight of the plant when calculating the amount of water needed to  
334 return the pot weight to the set point during watering jobs. This decreased the  
335 volume of water present within each pot after watering by approximately 12.5%  
336 (well-watered) and 17.5% (water-limited) on average by the end of the experiment  
337 (Fig. S4).

## Figure 2. Plant size and water use are tightly correlated.

Pearson Correlation Coefficient both within (blue is well-watered, orange is water-limited) and between (red is across both) treatment blocks indicates strong correlation between these two characteristics, although the correlation between the rate of plant growth and daily water use decreases as plants approach maximum size. A) Correlation between cumulative plant size and water use. B) The relationship between plant size and water use at 20, 25 and 30 days after planting. C) Correlation between the rate of plant growth and daily water use. B) The relationship between plant growth rate and daily water use at 20, 25 and 30 days after planting.

A

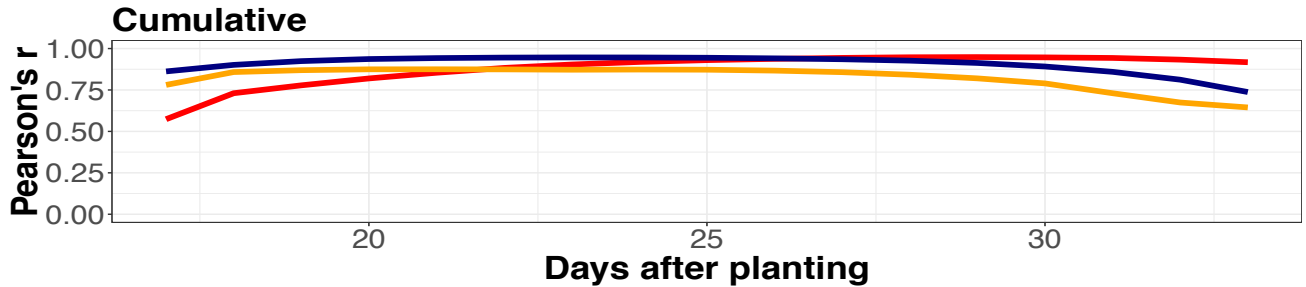

B

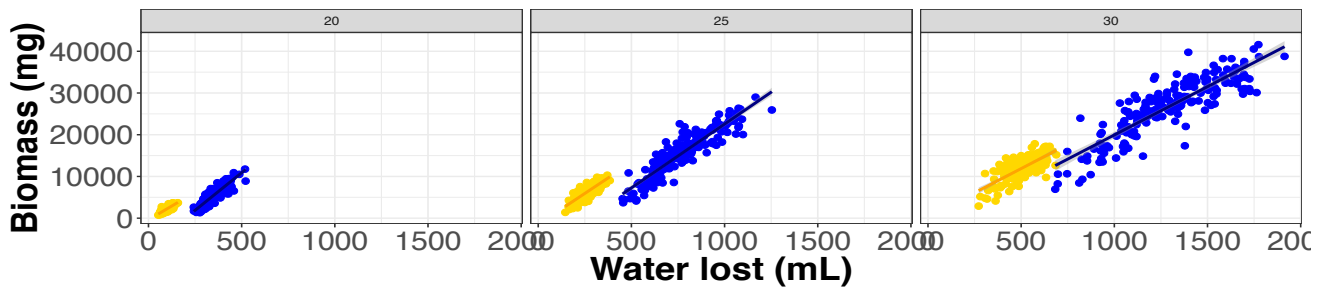

C

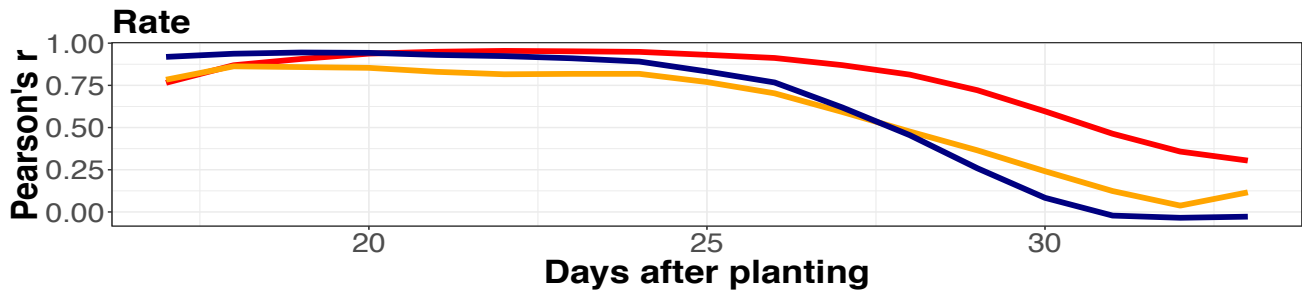

D

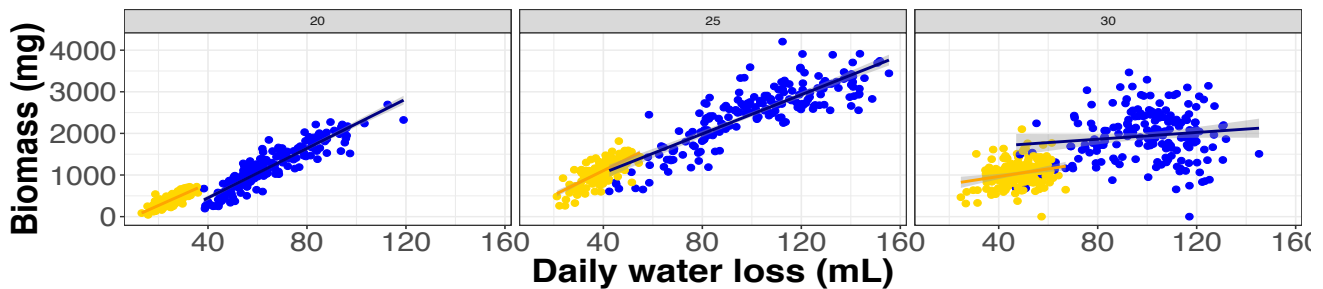

338 Loess smoothing was used to interpolate the values of traits on a genotype  
339 level within each treatment block across all experimental time points (Chambers  
340 and Hastie, 1992). Fitting of parametric models was avoided because in many cases  
341 the trait values exhibited genotype specific temporal responses that could not be  
342 accurately represented by a single model type across the entire population. Rate  
343 statistics were calculated from these loess smoothed estimates as the difference of  
344 the trait between days. Plots illustrating the mean and variance of each trait can be  
345 observed in FIG. S5.

346

#### 347 *Plant size and water use are correlated*

348 Over the course of this experiment cumulative plant size and water use were  
349 highly correlated. Correlation was tightest between 21 and 27 DAP in the well-  
350 watered treatment block ( $> 0.94$ ) and quite strong between 20 and 27 DAP in the  
351 water-limited treatment block ( $> 0.87$ , Fig. 2). In both treatment blocks, correlations  
352 between these characters were weakest at the beginning and end of the experiment  
353 but never dropped below 0.67. The correlation of the rate statistics associated with  
354 these traits appeared qualitatively different. Correlation between plant growth rate  
355 and the rate of water use was initially strong ( $> 0.79$ ) but rapidly decreased at about  
356 26 DAP as the rate of growth slowed (ultimately approaching zero) by the end of the  
357 experiment (Fig. 2) while transpiration remained high.

358 We implement two numerical approaches to characterize the genetic  
359 architecture of the relationship between these traits. The first method, which is  
360 hereafter referred to as the water use efficiency ratio ( $WUE_{ratio}$ ), calculated the ratio  
361 of biomass relative to the volume of water lost from the pot. This calculation was  
362 performed on a cumulative or daily rate basis.

363

364 Equation 3:

$$365 WUE_{ratio} (\text{pixel/mL}) = \text{plant size (pixel)} / \text{plant water lost (mL)}$$

366

367 Values of cumulative  $WUE_{ratio}$  calculated during this experiment were  
368 comparable to other experiments where plant size and water use was measured

**Figure 3. Modeling the relationship between plant size and water use results in two traits.** This approach results in predicted value of water use given size ( $WUE_{fit}$ ) colored in dark blue and deviations from this relationship ( $WUE_{residual}$ ) plotted in red. Plot illustrates this relationship at 30 days after planting.

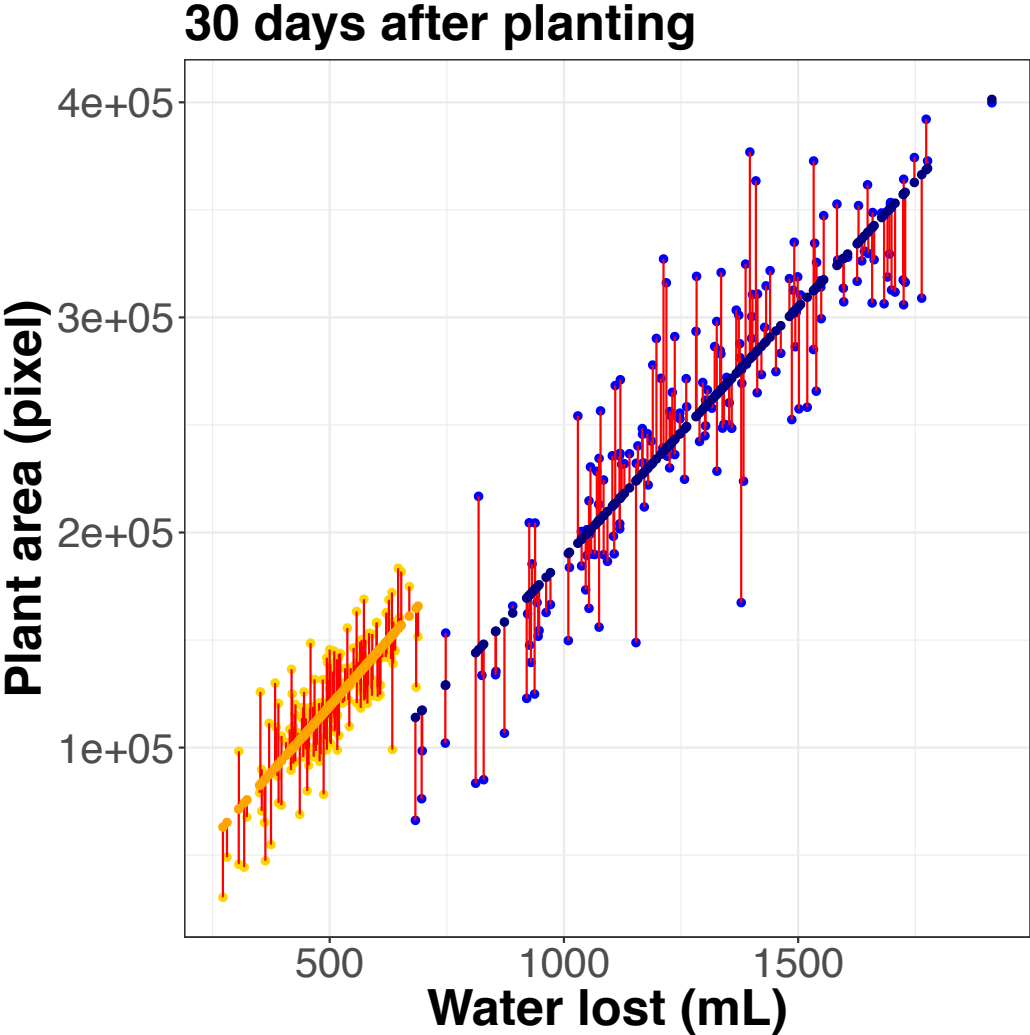



369 manually at lower throughput (25-29 grams fresh weight / Liter of water, 7-9 grams  
370 dry weight / Liter of water). On average, the cumulative and daily rate  $WUE_{ratio}$  was  
371 greater in the water-limited treatment block than in well-watered conditions. In  
372 principle, the  $WUE_{ratio}$  should attenuate the relationship between biomass and water  
373 use, but significant correlation was still observed between these two variables,  
374 particularly within the rate statistic over the last week of the experiment (Fig. S6,  
375 Fig. S7).

376 The high correlation between plant size and water use suggests that they  
377 were not independent traits in this experimental setup. Therefore, as a second  
378 approach, ordinary least squares linear regression was used to model the  
379 relationship between plant biomass and water use. For each day of the experiment,  
380 within treatment blocks a  $WUE_{model}$  was used to predict plant size  
381 (dependent/response variable) based upon water loss (independent/explanatory  
382 variable) (Fig. 3). The residual of this model fit was evenly distributed around zero  
383 across the entire distribution of the predicted values suggesting minimal bias of this  
384 approach (Fig. S8).

385

386 Equation 4:

$$387 \quad WUE_{fit} \text{ (pixel/mL)} = \text{plant size (pixel)} \sim \text{water lost (mL)} + WUE_{residual} \text{ (pixel/mL)}$$

388

389 This approach resulted in two traits: The first was the predicted model fit  
390 ( $WUE_{fit}$ ) that described the sum of squares relationship between biomass and water  
391 use. The residual of this model ( $WUE_{residual}$ ) can be thought of as genotype-specific  
392 deviation from this relationship combined with measurement error. As expected,  
393 the correlation between the fit values derived from the  $WUE_{model}$  was highly  
394 correlated with plant size (Fig. S9). A slight correlation between cumulative plant  
395 biomass and the residual of the  $WUE_{model}$  was observed particularly later in the  
396 experiment demonstrating that biomass had components that were not accounted  
397 for by the linear model fit (Fig. S10). Varying the dependence structure/assignment  
398 or fitting of the model using major axis regression framework (Legendre, 2014) had  
399 little effect on downstream analysis.

400 Each trait (biomass, water loss,  $WUE_{ratio}$ ,  $WUE_{fit}$  and  $WUE_{residual}$ ) exhibited  
401 high average heritability over all experimental time points within and across  
402 treatment blocks (0.28 – 0.77) (Fig. S11). Heritability tended to achieve its  
403 maximum value in the middle of the experiment with decreased heritability  
404 observed at the beginning and the end of the study. Proportionally, the treatment  
405 effect of water limitation explained the largest percentage of variance within  
406 biomass, water loss and the  $WUE_{fit}$  although genotype and genotype x treatment  
407 interaction also explain a substantial margin of the variance (Fig. S12). Heritability  
408 of the rate traits was generally similar but on average 5% lower than the heritability  
409 of the cumulative traits. In all cases, the average heritability of each trait was greater  
410 within the well-watered treatment block relative to the value calculated in water-  
411 limited treatment block.

412

#### 413 *The genetic architecture of plant size and water use traits*

414 For each day of the experiment, a best fit multiple QTL model was selected  
415 for each trait (plant size, water use,  $WUE_{ratio}$ ,  $WUE_{fit}$  and  $WUE_{residual}$ ) and the daily  
416 rate of change of the trait within each treatment block based upon penalized LOD  
417 score using a standard stepwise forward/backward selection procedure (Broman et  
418 al., 2003). This approach identified 86 (cumulative Fig. 4; Table S1) and 106 (rate  
419 Fig. S13; Table S1) unique SNPs associated with at least one of the five traits. Many  
420 of these uniquely identified SNP positions group into clusters of tightly linked loci  
421 that are likely representative of a single QTL location. These local clusters of SNPs  
422 (10 cM radius) were then condensed into the most significant marker within each  
423 cluster to simplify comparisons of genetic architecture between traits (Fig. S13; Fig.  
424 S14). Collapsing these SNP positions yielded 23 unique QTL locations associated  
425 with cumulative trait values (Fig. 5) and 27 unique rate QTL locations (Table S2).

426 Of the 23 unique QTL identified, plant biomass contributes the largest  
427 proportion of QTL to this set (18) followed by  $WUE_{ratio}$  (12),  $WUE_{fit}$  (11),  $WUE_{residual}$   
428 (10) and water lost (8) (Fig. 5, Fig. S16). Despite the fact that only one QTL location  
429 (2@96) was common across all traits and environments, the genetic architecture  
430 that contributes to each of these characteristics was clearly related. The strong

**Figure 4. Eighty-six unique QTL locations were detected across all traits in this experiment.**

Each box corresponds to an individual chromosome, where the values along the x-axis are chromosome position and values along the y-axis denote the proportion of genetic variance explained by the QTL. Each triangle represents a single QTL detected, where the color indicates the trait each QTL is associated with (green = plant size, blue = water use, orange =  $WUE_{ratio}$ , black =  $WUE_{fit}$ , red =  $WUE_{residual}$ ). The darkness of color shading is indicative of treatment block where darker represents well-watered and lighter corresponds to the water-limited block respectively. The direction of the arrow indicates the directional effect of the B100 parental allele.

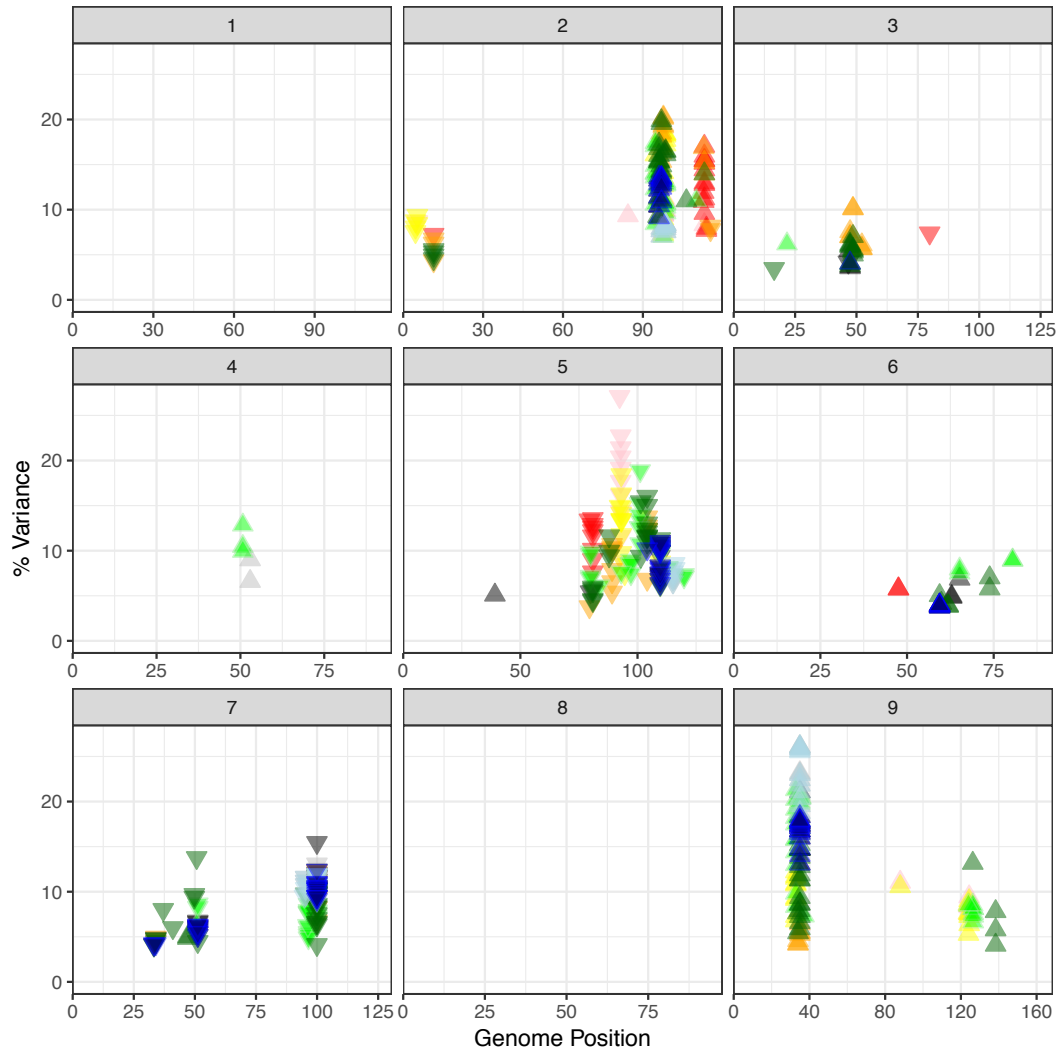

### Figure 5. The genetic components that contribute to subsets of traits largely overlap.

The QTL locations identified are plotted on the x-axis and the traits are plotted on the y-axis. Colored matrix entries denote at least one significant association within this experiment. A) The genetic architecture of cumulative traits. B) The genetic loci associated with trait rate of change. C) Genetic components associated with genotype x environment traits.

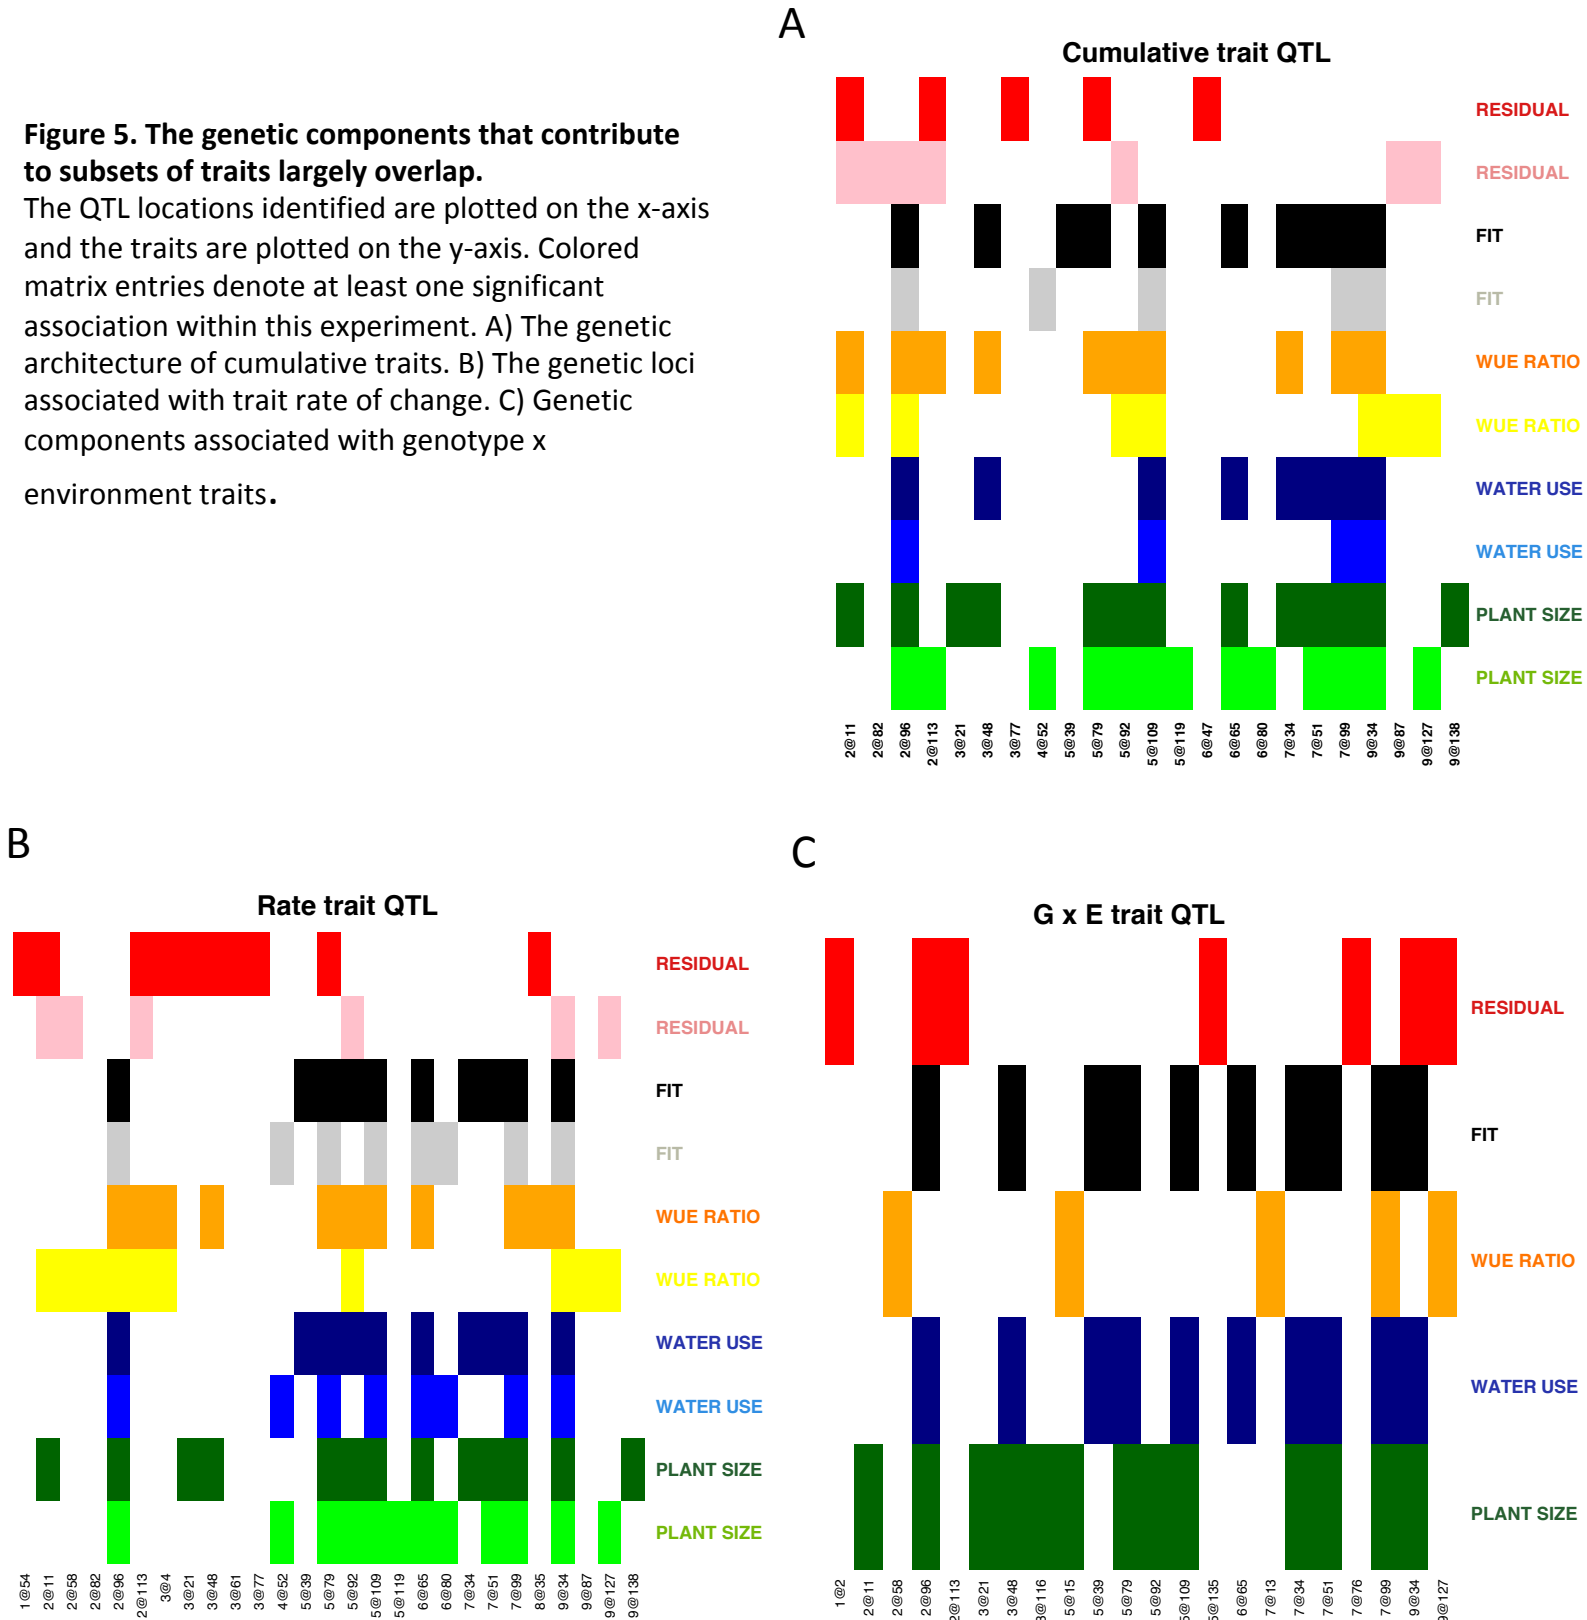

431 correlation of plant size and water loss with the predicted value of plant size given  
432 water loss ( $WUE_{fit}$ ) are clearly reflected within the genetic architecture associated  
433 with these traits. Plant size, water loss and  $WUE_{fit}$  all shared 8 QTL (2@96, 3@48,  
434 5@109, 6@65, 7@34, 7@51, 7@99 and 9@34) either within the well-watered or  
435 water-limited treatment block (Fig. 5, Fig. S16). Plant size,  $WUE_{ratio}$  and deviations  
436 from the relationship between plant size and water use ( $WUE_{residual}$ ) shared five QTL  
437 unique to this subset (2@11, 2@113, 5@79, 5@92, and 9@127) which enable  
438 divergence from the fundamental relationship between plant size and water loss  
439 (Fig. 5, Fig. S16). Several QTL were identified as being uniquely associated with  
440 plant size (3@21, 5@119, 6@80, 9@138),  $WUE_{residual}$  (2@82 3@77, 6@47) and  
441  $WUE_{fit}$  (5@39) whereas no QTL were identified as being uniquely associated with  
442 water loss or  $WUE_{ratio}$  (Fig. 5, Fig. S16).

443 The genetic architecture of all five traits appears to be influenced by water  
444 availability. All traits other than water loss exhibited QTL unique to each treatment  
445 block (Fig. 5, Fig. S17). Biomass, water lost, and  $WUE_{fit}$  all shared four QTL in  
446 common across environments (2@96, 5@109, 7@99 and 9@34) where as  $WUE_{ratio}$   
447 and the  $WUE_{residual}$  shared a single QTL (2@11) between blocks not found associated  
448 with the other traits. Two QTL (3@48, 7@34) were found specifically within the  
449 well-watered treatment block for all traits other than  $WUE_{residual}$  whereas QTL  
450 specific to water-limited environment identified common QTL associated with  
451 biomass and  $WUE_{fit}$  (4@52) or  $WUE_{ratio}$  and  $WUE_{residual}$  (9@87, 9@127).

452 The identity of QTL associated with the daily rate values suggest that the  
453 genetic architectures were largely cognate with the QTL associated with the traits  
454 themselves, both in identity and response to treatment. In total, 28 QTL comprised  
455 the union of all unique QTL associated with both the trait value and the daily rate of  
456 change calculated from the trait value. Of these QTL, 22 were common between both  
457 the trait value and rate statistic associated with the trait, whereas five are only  
458 found associated with the rate (1@54, 2@58, 3@4, 3@61, 8@35) and only one QTL  
459 was uniquely associated with the cumulative trait values alone (6@47) (Fig. S18).

460

461 *Genotype x environment interactions*

462 To assess the genetic architecture of genotype x environment interactions,  
463 mapping was performed on numerical difference, relative difference and trait ratio  
464 between the phenotypic values observed within each treatment block. In total, 148  
465 unique SNP locations were identified as being significantly associated with at least  
466 one of the difference trait formulations across all standard and derived plant size  
467 and water use traits (Table S3). Substantial overlap between these categories of  
468 genotype x interaction traits indicates that each formulation detects similar genetic  
469 signals (Fig. S19) although the large number SNPs found uniquely associated with  
470 the trait ratio may indicate that some of these associations may be spurious. As such,  
471 these QTL (trait ratio genotype x environment QTL) were removed from further  
472 analysis. The numerical difference and relative difference traits exhibited  
473 association with 43 and 40 unique SNP positions, which were representative of 20  
474 and 18 QTL respectively (Table S4, Fig. S20-22).

475

476 A majority of the QTL (10/15) identified as being associated with the trait  
477 difference between treatment blocks were also found associated with the  
478 cumulative trait in both treatment blocks (Fig. 5). The exceptions to this were QTL  
479 located on 3@21, 3@48, 5@39, 7@34 and 9@127 that were identified as being  
480 significantly associated with the difference between treatment blocks but only  
481 identified in either well-watered (3@21, 3@48, 5@39, 7@34) or water-limited  
482 conditions (9@127). Interestingly, the QTL located on 3@48, 7@34 and 9@127  
483 were associated with more than one trait in a single treatment block which may  
484 indicate that these QTL impart pleiotropic phenotypic effects that were dependent  
485 upon soil water content (Fig. 5).

486

#### 487 *The temporal genetic architecture of plant growth and water usage*

488 In order to account for the time dependence of the traits for the five plant  
489 traits, we used a function-valued approach based upon average log-odds score  
490 throughout across the experiment (SLOD) for each trait (Kwak et al., 2016). This  
491 analysis parallels the individual time point analysis, although the reduction of

**Figure 6. Significant associations identified using single marker scan functional QTL mapping.**

Chromosomal position is plotted on the x-axis whereas LOD score of trait association across the genome is plotted on the y-axis. Treatment block is indicated by color intensity (darker is well-watered and lighter is water-limited). Significance thresholds (based on 1000 permutations) are plotted as dashed yellow (water-limited) and red (well-watered) lines respectively.

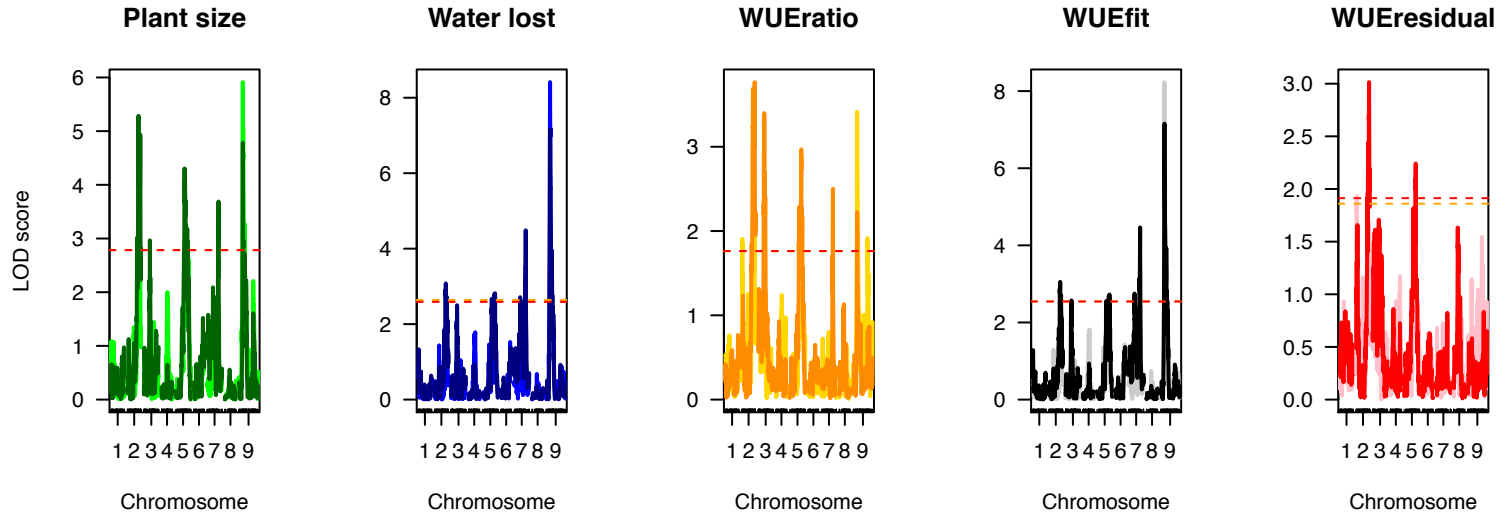



492 complexity (fewer, higher confidence QTL) provides an opportunity for  
493 simplification and better understanding of the major loci that influence plant WUE.

494 SLOD based function-valued QTL models indicate that several major QTL  
495 (2@96, 5@109, 7@99, and 9@36) influenced both plant size and water use related  
496 traits, although the magnitude of statistical significance attributed to each loci  
497 varied by trait and throughout plant development (Fig. 6, Fig S23). Using the SLOD  
498 approach, we were able to partition combinations of QTL unique to related traits  
499 (Fig. 6). For several QTL (those around 2@96 and 5@109) the positional location at  
500 which maximal LOD score was observed changed noticeably in a trait and  
501 environment dependent manner either due to multiple closely linked loci or noise in  
502 our measurements. Because the confidence intervals of the QTL generally overlap,  
503 our reporting in this section will hereafter refer to these loci by their approximate  
504 chromosomal location.

505 Both plant biomass and cumulative water use exhibited almost a complete  
506 overlap of QTL within the well-watered treatment block, whereas plant size given  
507 water use ( $WUE_{fit}$ ) and deviation of plant size from this fundamental relationship  
508 ( $WUE_{residual}$ ) each exhibit a unique genetic signature (Fig 6). As observed when trait  
509 values at individual time points were treated as independent traits, a single QTL on  
510 2@96 is the only genetic component that was shared across all five traits. The linear  
511 modeling approach successfully partitions out QTL associated with  $WUE_{fit}$  (2@96,  
512 7@99, 9@36) from the genetic components that contribute to deviations from the  
513 plant size ~ water use relationship ( $WUE_{residual}$ ; 2@96, 5@109). The QTL associated  
514 with the  $WUE_{ratio}$  (2@96, 3@52, 5@109) also likely reflects deviations from the  
515 relationship between biomass given water loss associated with the  $WUE_{residual}$ .  
516 Overall, the identity of QTL associated with each trait was largely identical between  
517 the two treatment blocks (Fig. 6, Fig. S23) as were the QTL associated with the  
518 values of rate statistics derived from these measurements (Fig. S24, stepwise  
519 method; Fig. S25, scanone method).

520

521 *A temporal model of the genetic architecture that influences plant water use efficiency*

522 Our QTL results suggest at least two components of water use efficiency with  
523 distinct genetic architectures. In order to compare the genetic architecture across all  
524 traits, treatments and time points in a common framework, we analyzed how each  
525 trait was influenced by a common set of loci. Fourteen QTL were selected based  
526 upon their association with multiple traits, robust linkage with a single trait and/or  
527 having differential contribution to traits across treatment blocks (Table S5) and the  
528 proportional contribution of each locus to the additive genetic variance was  
529 calculated using drop-one-term, type III, ANOVA performed for all experimental  
530 traits, time points and treatment. Agglomerative hierarchical clustering of the  
531 signed proportion of additive genetic variance explained by each locus was  
532 performed to identify modules of traits and loci that define plant phenotypes.  
533 Examination of scree plots of the within group sum of squares suggested that the  
534 variance within traits could be attributed to approximately six groupings although a  
535 majority of this variance could be captured within the largest 2-3 partitions (Fig.  
536 S26). These partitions represented the major relationships between trait classes.  
537 The  $WUE_{ratio}$  and  $WUE_{residual}$  were generally grouped separately from a larger cluster  
538 of traits that included cumulative plant size, water use and  $WUE_{fit}$  (Fig. 7). The  
539 genetic architecture of plant water use and  $WUE_{fit}$  were more related to each other  
540 than they were to plant size, which formed the third group. The influence of water  
541 availability on these traits was apparent from the grouping of clusters whereas the  
542 effects of time were clear but distributed within the treatment blocks. The genetic  
543 architecture of the  $WUE_{ratio}$  in the well-watered treatment block at early time points  
544 was more similar to the architecture of plant area than itself later in development  
545 whereas plant area in the water-limited treatment block exhibited a genetic  
546 architecture similar to the  $WUE_{ratio}$  late at the end of the experiment.

547 Examination of the signed, proportional allelic effects within the greater fixed  
548 QTL model indicated that QTL on 2@96, 5@109, 7@99 and 9@34 contribute  
549 medium-to-large effects on a majority of the traits examined in both treatment  
550 blocks (Fig. 8). The B100 allele associated with QTL on 2@96 and 9@34 both  
551 contributed to increased plant size, water loss,  $WUE_{fit}$  and  $WUE_{ratio}$ . The QTL on  
552 2@96 exhibited its greatest influence in the well-watered treatment block whereas

**Figure 7. Agglomerative hierarchical clustering defines the relationship between plant size, water use and derived water use efficiency traits.**

The additive effect size of fourteen common QTLs was calculated across all traits, treatments and developmental time points through hierarchical clustering using Ward's method. Color bars on the bottom indicate trait (green = plant size, blue = water use, orange =  $WUE_{ratio}$ , black =  $WUE_{fit}$ , red =  $WUE_{residual}$ ), treatment block (blue = well-watered, orange = water limited), and days after planting (grey scale values where white represents the trait on day 17 and black indicates the trait on day 33).

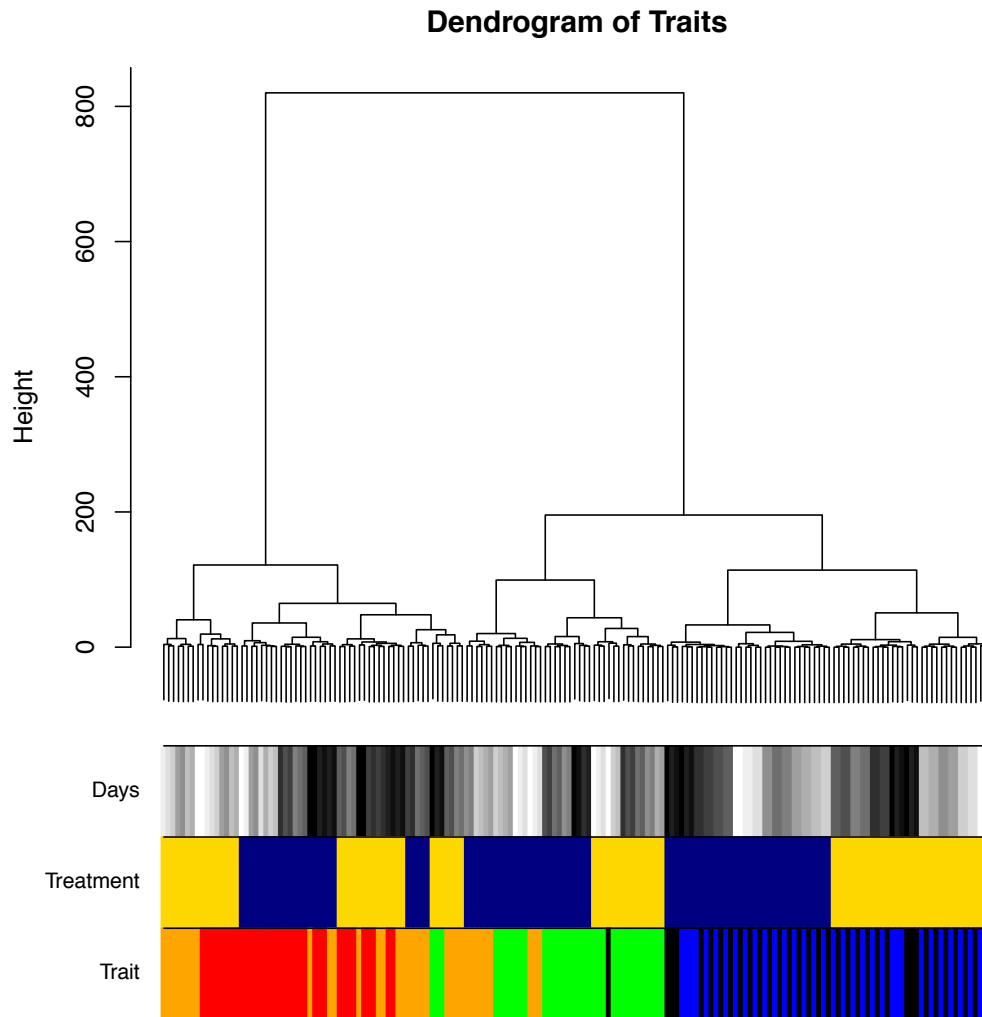

### Figure 8. Additive relative effect size of the four major pleiotropic QTL plotted throughout the course of the experiment.

A model containing fourteen QTL was fit across traits, treatment blocks and days. The developmental time point (days after planting) is indicated by the x-axis whereas the proportional additive genetic effect size of the B100 allele is plotted along the y-axis. Columns are representative of traits (green = plant size, blue = water use, orange =  $WUE_{ratio}$ , black =  $WUE_{fit}$ , red =  $WUE_{residual}$ ) while rows correspond to individual QTL. Shading within the colors denotes treatment block (darker = well-watered, lighter = water-limited).

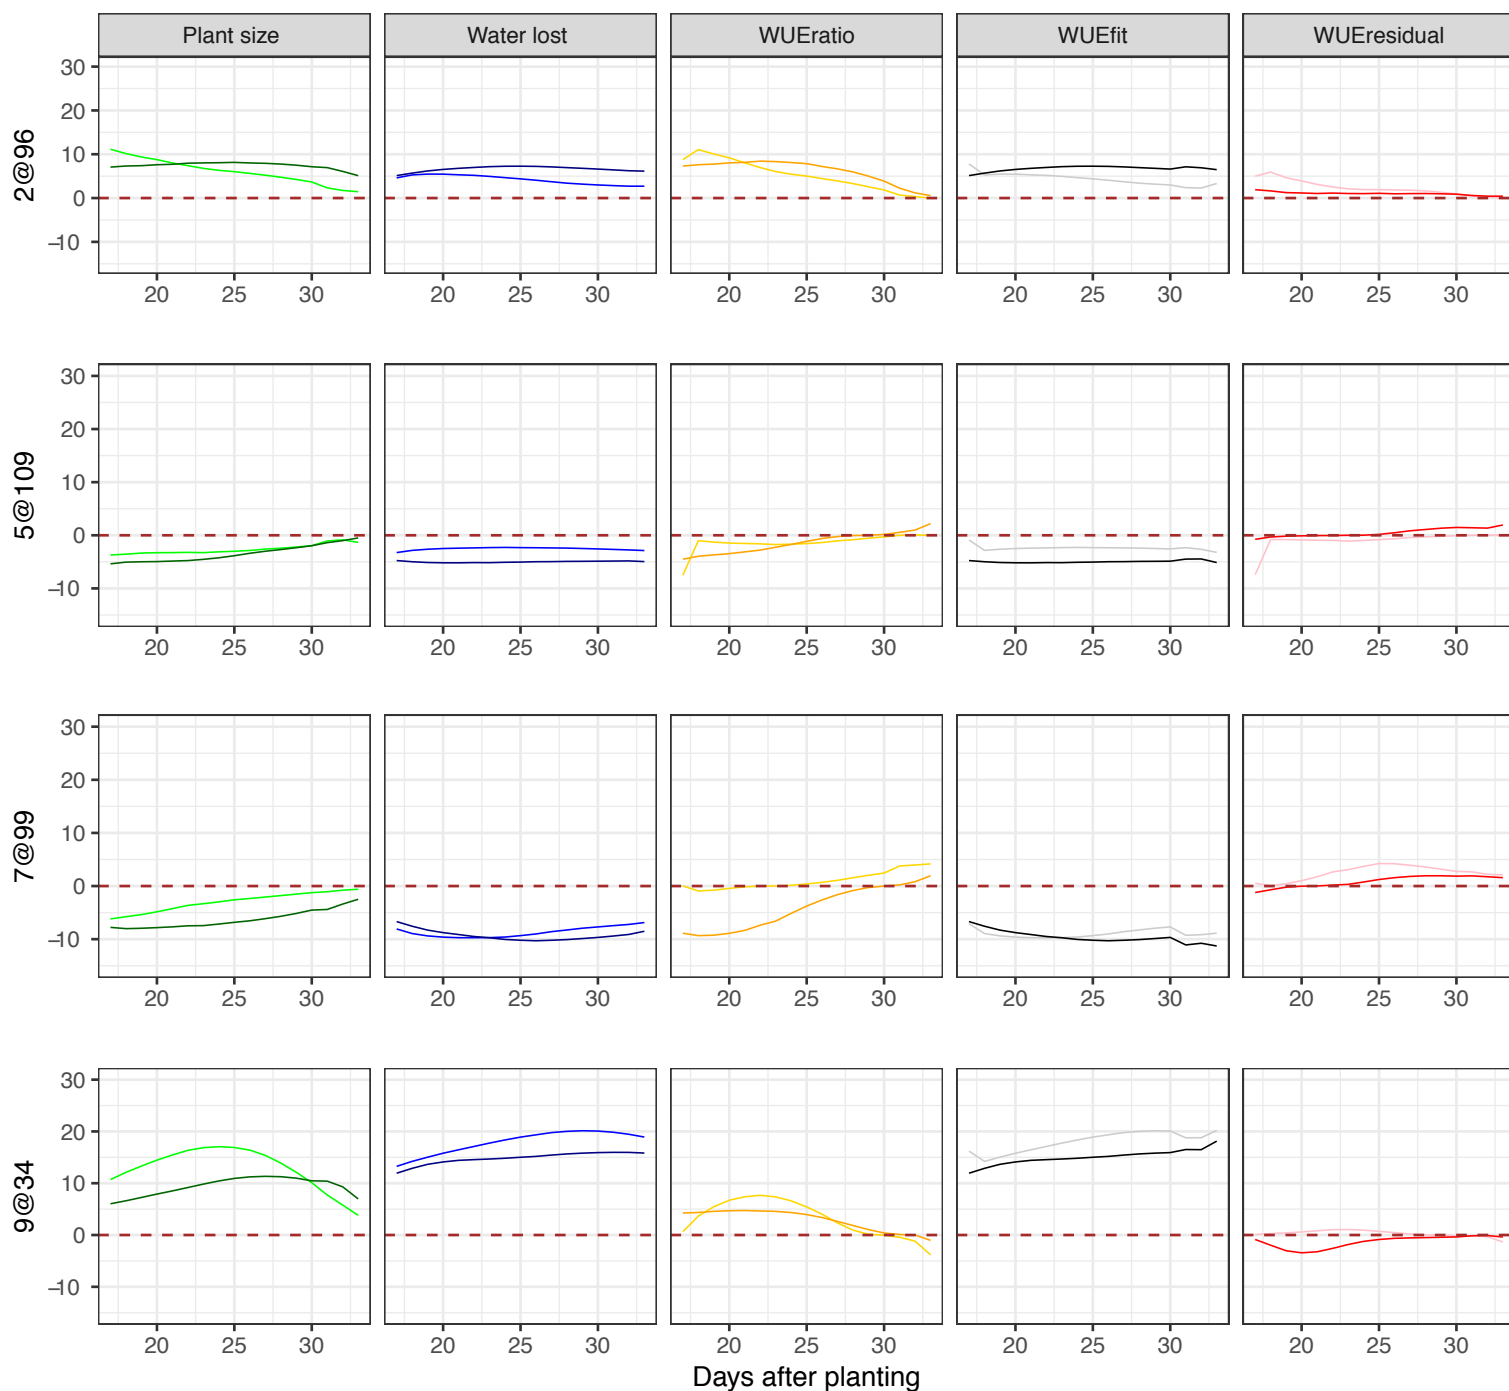

553 the contribution of 9@34 was greater on average in the water-limited treatment  
554 block. Both QTL exhibited similar temporal patterns, showing an earlier effect on  
555 plant size and  $WUE_{ratio}$  but a consistent effect across water loss. Contribution of the  
556 B100 allele on 7@99 and 5@109 decrease plant size, water use and the  $WUE_{fit}$   
557 traits; the effect of which was greater in well-watered conditions. The magnitude of  
558 effects contributed by QTL on 7@99 on plant size decreased through time whereas  
559 the effects on water loss and  $WUE_{fit}$  peaked after 20 days and decreases slightly  
560 thereafter. The 5@109 locus behaves similarly with little temporal variation in  
561 plant water use and  $WUE_{fit}$ . A majority of the other QTL contributed minor effects  
562 that became more prominent in one of the two treatment blocks or at a particular  
563 developmental time points. Inheriting the B100 allele at QTL on 2@113, 3@48,  
564 4@52, 6@65 and 9@127 increased the values while the B100 allele at the remaining  
565 loci (2@11, 5@79, 5@95, 7@34 and 7@53) decreased the value of the traits (Fig.  
566 S27).

567 A majority of the QTL exhibit unidirectional effects across both the well-  
568 watered and water-limited treatment blocks although the direction of the effect was  
569 largely dependent on the trait (Fig. S28). The exceptions to this trend represent  
570 short periods of experimental time at which the relative effect size is near zero  
571 within one or both treatment blocks (Fig. 8, Fig. S27).

572 The proportional contribution of parental alleles towards increased trait  
573 values varied between traits, within treatment blocks and throughout plant  
574 development. For example, B100 alleles contributed to increased trait values for all  
575 traits other than  $WUE_{ratio}$  in the water-limited environment and the  $WUE_{residual}$   
576 across both treatment blocks (Fig. 9). Alternatively, the contributions of the A10  
577 alleles proportionally increased the  $WUE_{residual}$  value early and then again late in  
578 plant development relative to those inherited from the B100 parent. The influence  
579 of A10 alleles on the  $WUE_{ratio}$  was also greater their B100 counterpart under water-  
580 limited conditions early in plant development.

581

582 **DISCUSSION**

**Figure 9. The proportional contribution of parental alleles to increased trait values depend upon trait, environmental water content and plant developmental stage.**

Alleles derived from the B100 parent contribute a greater proportional of additive genetic variance to plant size, water use and TE model fit in both well-watered and water-limited conditions than their A10 allelic counterparts. Both the WUE ratio and TE model residual traits exhibit dynamic behavior where A10 alleles contribute either greater or close to equal proportions of additive genetic variance early and late in plant development. A) The contribution of parental alleles in the water-limited treatment block. B) The contribution of parental alleles in the water-limited treatment block.

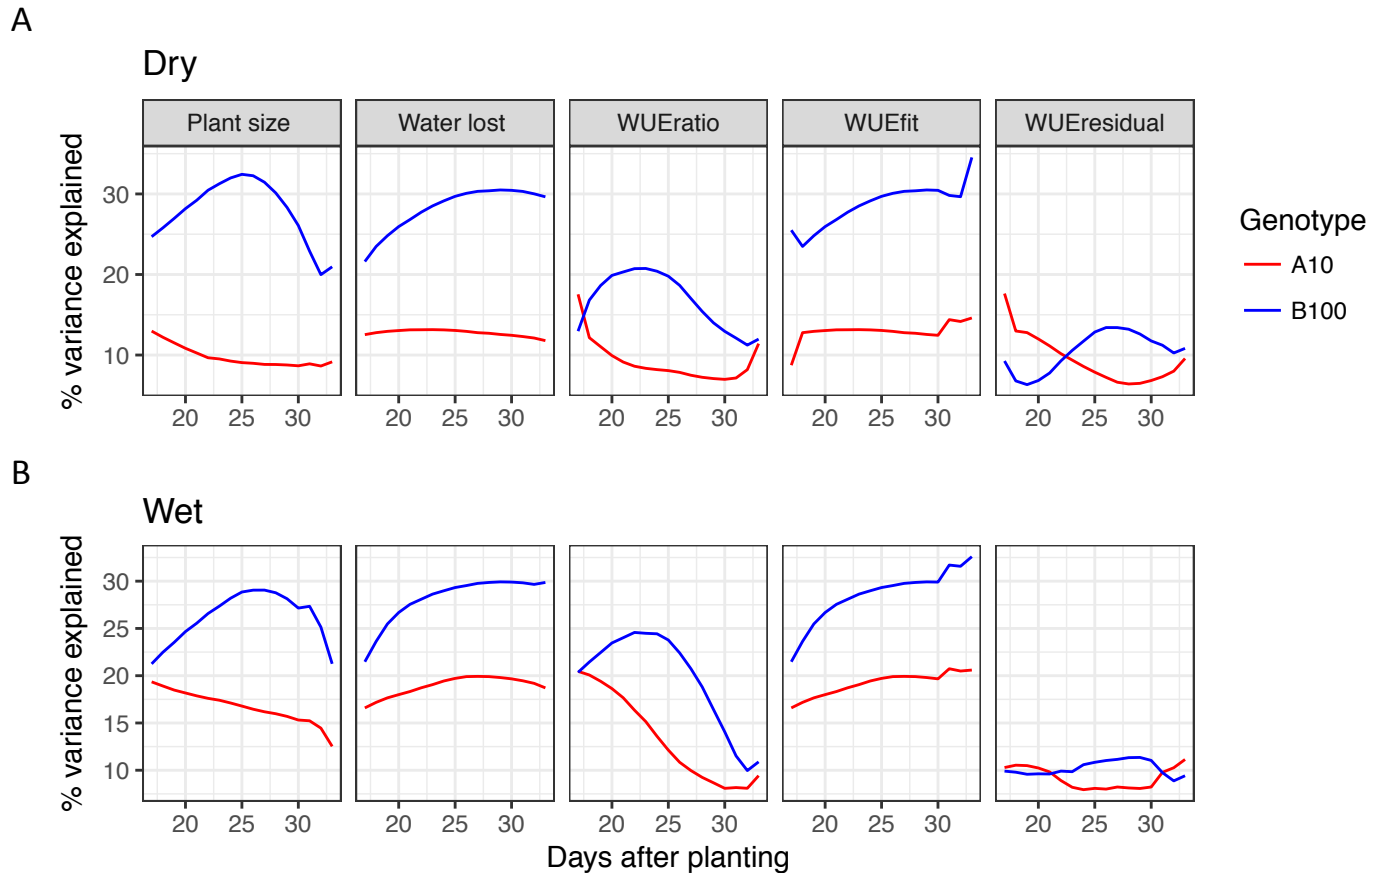

583           The objectives of this study were to utilize technological advances in high-  
584 throughput phenotyping (Chen et al., 2014; Fahlgren et al., 2015; Granier et al.,  
585 2006; Pereyra-Irujo et al., 2012; Reuzeau et al., 2006; Sadok et al., 2007; Tisné et al.,  
586 2013; Walter et al., 2007) to characterize the genetic architecture of water use  
587 efficiency and how this architecture responds to water-limitation in an experimental  
588 C<sub>4</sub> grass model system. Although considerable efforts have been made to  
589 characterize these processes in *Arabidopsis thaliana*, C<sub>3</sub> grass crops and other  
590 species (Ruggiero et al., 2017) this represents the first study performed on an  
591 annual C<sub>4</sub> grass RIL population. These efforts enabled us to identify genetic loci that  
592 contribute to differential biomass accumulation given water use in a well-watered  
593 and water-limited environment. Our findings suggest that the major genetic  
594 components associated with plant size, water use and water use efficiency exhibit  
595 pleiotropic behavior and that the magnitude of their allelic effects is dependent  
596 upon environment and developmental stage. We used two complementary  
597 approaches to define traits, and our analysis confirmed that the genetic architecture  
598 was similar with both approaches. We show that the loci controlling biomass  
599 accumulation can be roughly divided into two groups: those that control the amount  
600 of water used to create biomass (WUE<sub>fit</sub>) and those that control how efficiently that  
601 water is used (WUE<sub>residual</sub>). The results from this study indicate that alleles from  
602 both domesticated foxtail millet and a species representative of its wild progenitor  
603 contribute to maximal vegetative biomass yield or water use efficiency grown in  
604 environments with different watering regimes. In addition, we highlight aspects of  
605 our experimental design and analysis that could be improved in future studies.

606

607 *The genetic architecture of plant size, water use, water use efficiency and the*  
608 *relationship between these traits*

609           Within the A10 x B100 *Setaria* RIL population, plant size, water use and the  
610 relationship between these two variables are unique polygenic traits whose values  
611 are all likely influenced by greater than 10 loci. Four QTL located on 2@96, 5@106,  
612 7@99 and 9@36 exhibit strong pleiotropic influence across this suite of traits, the  
613 relative magnitude of each is dependent upon growth environment and



614 developmental time point. Despite strong correlation between plant size and water  
615 use we successfully identified genetic architectures distinct to each trait. This was  
616 achieved by modeling plant size as a function of water use and examining the  
617 resulting values of the model fit (plant size given water use) and deviations from  
618 this relationship (residual of plant size given water use). This linear modeling  
619 approach has been used much less frequently in the literature (Lopez et al., 2015;  
620 Nakhforoosh et al., 2016) than the more commonly used  $WUE_{ratio}$  (Adiredjo et al.,  
621 2014; Honsdorf et al., 2014; Aparna et al., 2015; Fahlgren et al., 2015; Lopez et al.,  
622 2015). While the genetic architectures associated with the  $WUE_{ratio}$  and  $WUE_{residual}$   
623 in this population are closely related (Fig. 7),  $WUE_{residual}$  exhibits substantial  
624 heritability and is less correlated with plant size than the  $WUE_{ratio}$  (Fig. S6 Fig. S10),  
625 making it a more desirable metric.

626 By examining the model based components of WUE with function valued  
627 single marker scan QTL analysis that accounts for multiple hypothesis testing across  
628 time points (Kwak et al., 2016), we were able to partition the four major pleiotropic  
629 QTL into the genetic components on 2@96, 7@99 and 9@36, which control plant  
630 size given water use ( $WUE_{fit}$ ) and those on 2@96 and 5@109 that contribute to  
631 deviations from this relationship ( $WUE_{residual}$ ). This result suggests that QTL  
632 associated with  $WUE_{fit}$  (7@99 and 9@36) potentially control the development of  
633 transpiring plant biomass whereas the QTL associated with the  $WUE_{residual}$  and  
634  $WUE_{ratio}$  (2@96 and 5@109) influence production of non-transpiring tissues or  
635 biological processes not directly related to transpiration. This conclusion is in  
636 accordance with the results of other studies performed on this population which  
637 demonstrate that these loci are largely pleiotropic (Mauro-Herrera and Doust,  
638 2016), although the loci on 2@96 and 5@100 substantially influence plant height  
639 (Feldman et al., 2017) and stem biomass, whereas those on 7 and 9 are not  
640 associated with the accumulation of stem material (Banan et al., 2017).

641 Our study also identified many smaller effect QTL which influence biomass,  
642 water use and WUE traits. The B100 parental allele contributes substantial positive  
643 (3@48, 4@52, 6@65, 9@127) and negative (7@34, 7@53) effects on all traits,  
644 whereas QTL on 2@11, 2@113, 5@79 and 5@95 contribute either to plant

645 size/ $WUE_{ratio}$ / $WUE_{residual}$  ratio to a greater degree than on plant size/water  
646 loss/ $WUE_{fit}$ .

647         Roughly two thirds of the QTL associated with trait plasticity as a response to  
648 water availability (difference or relative difference between treatment blocks) were  
649 also identified as being associated with the cumulative traits within both treatment  
650 blocks. This observation indicates that in many cases, soil water content influences  
651 the temporal dynamics of the allelic effects by differential progression through  
652 developmental processes that share similar genetic components (Feldman et al.,  
653 2017). This study identifies several QTL (3@48, 7@34 and 9@127) associated with  
654 genotype by environment traits which also exhibit significant influence on multiple  
655 plant traits within a single treatment block. This provides relatively strong evidence  
656 that these QTL have pleiotropic influence on size and water use related traits in an  
657 environment specific manner. In contrast, QTL identified only by mapping on the  
658 difference or relative difference of the traits between each environment are largely  
659 specific to individual traits.

660         Evidence from this study supports an evolutionary genetic model where the  
661 majority of QTL associated with the measured traits exhibit conditional neutrality  
662 across both soil water potentials examined. Although all traits other than plant size  
663 sometimes exhibit opposite directional effects across treatment blocks, the evidence  
664 supporting a model of antagonistic pleiotropy is weak. When identified, QTL  
665 exhibiting opposite directional effects within individual treatment blocks were  
666 limited to short periods of experimental time and are characterized by negligible  
667 relative effects during these time points. The contributions of alleles from both  
668 parental lines contribute to increased WUE irrespective of soil water potential,  
669 suggesting that neither parent was optimized for WUE. For example, alleles from the  
670 A10 parent contribute a greater proportion of additive genetic variance to increased  
671 WUE during early development in both well-watered and water-limited  
672 environments, (particularly given the  $WUE_{residual}$  derivation of WUE) whereas the  
673 alleles derived from the B100 parent have greater affect on a majority of the  
674 measured traits throughout the time course. The contribution of alleles of both  
675 parents to water use efficiency is expected given earlier study performed on the

676 same platform where parental lines showed similar WUE under water-limited  
677 conditions (Fahlgren et al., 2015).

678

679 *Considerations when measuring plant size, water use and WUE*

680 As observed in many other studies (Chen et al., 2012; Fahlgren et al., 2015;  
681 Ge et al., 2016; Golzarian et al., 2011; Honsdorf et al., 2014; Lopez et al., 2015;  
682 Parent et al., 2015), relative plant side-view pixel area provided a robust and  
683 accurate proximity measurement of plant biomass. Although incorporation of  
684 additional plant architectural features can improve estimates of this relationship  
685 (Parent et al., 2015), our results indicate that caution should be taken as to not over  
686 fit models on ground truth data collected exclusively at the end of the experiment as  
687 was performed in this study (Fig. S1).

688 Automated or manual gravimetric measurement of pot weight has proven to  
689 be a reliable estimator of plant transpiration but only if the evaporative loss of  
690 moisture from soil can be accounted for. Results presented in this study indicate  
691 that inclusion of empty pots (or pots that contain plastic plants (Parent et al., 2015)  
692 or fabric wicks (Halperin et al., 2017)) is an appropriate empirical method to  
693 estimate the experimental time point at which transpiration contributes  
694 meaningfully to total pot evapotranspiration (Coupel-Ledru et al., 2016; Lopez et al.,  
695 2015; Pereyra-Irujo et al., 2012). Estimation of evapotranspiration after this critical  
696 time point has been effectively used by several other groups to identify and  
697 eliminate confounding data points collected early during similar experiments  
698 (Vasseur et al., 2014; Coupel-Ledru et al., 2016; Ge et al., 2016). Our findings  
699 indicate that subtraction of empty pot weight (as performed by (Pereyra-Irujo et al.,  
700 2012; Parent et al., 2015; Coupel-Ledru et al., 2016)) may overcorrect for  
701 evaporation at early experimental time points even after the point at which plant  
702 transpiration contributes substantially to total pot water loss. Although not applied  
703 during this experiment, utilization of plastic covering to shield pots from  
704 evaporative moisture loss in combination with the approaches discussed above may  
705 improve the ability to unambiguously quantify plant transpiration (Aparna et al.,  
706 2015; Coupel-Ledru et al., 2016; Ellsworth et al., 2017; Granier et al., 2006; Halperin

707 et al., 2017; Vasseur et al., 2014). In this study, the contribution of plant biomass to  
708 overall pot weight was not accounted for during the estimation of plant water use.  
709 Although the contribution of plant biomass to pot weight in most experiments  
710 performed using *Arabidopsis thaliana* is negligible (Tisné et al., 2010), plant biomass  
711 within this *Setaria* RIL population accounted for 12-18% of total average pot water  
712 content by the end of the experiment (Fig. S4). Our inability to account for this  
713 growth has the undesirable effect of systematically decreasing the soil water  
714 content of larger genotypes, although in practice this small change in soil water  
715 potential likely has minimal impact on transpiration dynamics of the plants.

716 Strong correlation between plant size and water use was observed in spite of  
717 the fact that these traits can potentially be controlled by different physiological  
718 mechanisms. A similar trend has also been described in experiments designed to  
719 study water use efficiency in *Arabidopsis thaliana*, apple and wheat (Lopez et al.,  
720 2015; Nakhforoosh et al., 2016; Schoppach et al., 2016; Parent et al., 2015; Vasseur  
721 et al., 2014). The magnitude of this correlation is likely inflated in this study due to  
722 the large differences in size between parental lines and segregants within the A10 x  
723 B100 RIL population. Future studies aimed at investigating the genetic basis of  
724 water use efficiency can attenuate this correlation by selecting parental lines of  
725 similar size and flowering times that differ in their rates of transpiration within  
726 environments of interest.

727

## 728 **CONCLUSIONS**

729 This study leverages recent advances in high-throughput phenotyping and  
730 quantitative genetics to identify the genetic loci associated with plant size, water use  
731 and water use efficiency in an interspecific RIL population of the model C<sub>4</sub> grass  
732 *Setaria*. Our findings indicate that these traits are highly heritable and largely  
733 polygenic, although the effects of four major pleiotropic QTL account for a  
734 substantial proportion of the variance observed within each trait. Contribution of  
735 parental alleles from both the domesticated and wild progenitor lines contribute to  
736 maximization of these characteristics. Overall, the underlying genetic architecture of  
737 each of these processes is distinct and substantially influenced by soil water content

738 as well as plant developmental stage. In addition, several aspects of our  
739 experimental design which could be improved to obtain a better understanding of  
740 the genetic components that underlie plant size, water use and water use efficiency  
741 in future high-throughput phenotyping studies.

742

## 743 REFERENCE

- 744 **Adiredjo AL, Navaud O, Muños S, Langlade NB, Lamaze T, Grieu P (2014)**  
745 Genetic Control of Water Use Efficiency and Leaf Carbon Isotope  
746 Discrimination in Sunflower (*Helianthus annuus* L.) Subjected to Two  
747 Drought Scenarios. *PLoS ONE* **9**: e101218
- 748 **Aparna K, Nepolean T, Srivastava RK, Kholová J, Rajaram V, Kumar S, Rekha**  
749 **B, Senthilvel S, Hash CT, Vadez V (2015)** Quantitative trait loci associated  
750 with constitutive traits control water use in pearl millet [*Pennisetum*  
751 *glaucum* (L.) R. Br.]. *Plant Biol* **17**: 1073–1084
- 752 **Assouline S, Or D (2013)** Plant Water Use Efficiency over Geological Time –  
753 Evolution of Leaf Stomata Configurations Affecting Plant Gas Exchange. *PLoS*  
754 *ONE* **8**: e67757
- 755 **Bacon M (2009)** Water Use Efficiency in Plant Biology. John Wiley & Sons, New  
756 York, NY
- 757 **Banan D, Paul R, Feldman MJ, Holmes M, Schlake H, Baxter I, Leakey ADB**  
758 (2017) High fidelity detection of crop biomass QTL from low-cost imaging in  
759 the field. doi: 10.1101/150144
- 760 **Bates D, Mächler M, Bolker B, Walker S (2015)** Fitting Linear Mixed-Effects  
761 Models Using lme4. *J Stat Softw.* doi: 10.18637/jss.v067.i01
- 762 **Bennetzen JL, Schmutz J, Wang H, Percifield R, Hawkins J, Pontaroli AC, Estep**  
763 **M, Feng L, Vaughn JN, Grimwood J, et al (2012)** Reference genome  
764 sequence of the model plant *Setaria*. *Nat Biotechnol* **30**: 555–561
- 765 **Blatt MR (2000)** Cellular Signaling and Volume Control in Stomatal Movements in  
766 Plants. *Annu Rev Cell Dev Biol* **16**: 221–241
- 767 **Blum A (2009)** Effective use of water (EUW) and not water-use efficiency (WUE) is  
768 the target of crop yield improvement under drought stress. *Field Crops Res*  
769 **112**: 119–123
- 770 **Boutraa T (2010)** Improvement of Water Use Efficiency in Irrigated Agriculture: A  
771 Review. *J Agron* **9**: 1–8

- 772 **Boyer JS** (1982) Plant Productivity and Environment. *Science* **218**: 443–448
- 773 **Bozdogan H** (1987) Model selection and Akaike's Information Criterion (AIC): The  
774 general theory and its analytical extensions. *Psychometrika* **52**: 345–370
- 775 **Brodribb TJ, Feild TS, Jordan GJ** (2007) Leaf Maximum Photosynthetic Rate and  
776 Venation Are Linked by Hydraulics. *PLANT Physiol* **144**: 1890–1898
- 777 **Brodribb TJ, McAdam SAM, Jordan GJ, Feild TS** (2009) Evolution of stomatal  
778 responsiveness to CO<sub>2</sub> and optimization of water-use efficiency among land  
779 plants. *New Phytol* **183**: 839–847
- 780 **Broman KW, Wu H, Sen S, Churchill GA** (2003) R/qtl: QTL mapping in  
781 experimental crosses. *Bioinformatics* **19**: 889–890
- 782 **Brutnell TP, Wang L, Swartwood K, Goldschmidt A, Jackson D, Zhu X-G, Kellogg**  
783 **E, Van Eck J** (2010) *Setaria viridis*: A Model for C<sub>4</sub> Photosynthesis. *Plant Cell*  
784 **22**: 2537–2544
- 785 **Carmo-Silva AE, Francisco A, Powers SJ, Keys AJ, Ascensao L, Parry MAJ,**  
786 **Arrabaca MC** (2009) Grasses of different C<sub>4</sub> subtypes reveal leaf traits  
787 related to drought tolerance in their natural habitats: Changes in structure,  
788 water potential, and amino acid content. *Am J Bot* **96**: 1222–1235
- 789 **Chambers JM, Hastie T, eds** (1992) Statistical models in S. Wadsworth &  
790 Brooks/Cole Advanced Books & Software, Pacific Grove, Calif
- 791 **Chaves MM** (1991) Effects of Water Deficits on Carbon Assimilation. *J Exp Bot* **42**:  
792 1–16
- 793 **Chen D, Neumann K, Friedel S, Kilian B, Chen M, Altmann T, Klukas C** (2014)  
794 Dissecting the Phenotypic Components of Crop Plant Growth and Drought  
795 Responses Based on High-Throughput Image Analysis. *Plant Cell Online* **26**:  
796 4636–4655
- 797 **Chen J, Chang SX, Anyia AO** (2012) Quantitative trait loci for water-use efficiency  
798 in barley (*Hordeum vulgare* L.) measured by carbon isotope discrimination  
799 under rain-fed conditions on the Canadian Prairies. *Theor Appl Genet* **125**:  
800 71–90
- 801 **Condon AG** (2004) Breeding for high water-use efficiency. *J Exp Bot* **55**: 2447–2460
- 802 **Condon AG, Richards RA, Rebetzke GJ, Farquhar GD** (2002) Improving Intrinsic  
803 Water-Use Efficiency and Crop Yield. *Crop Sci* **42**: 122–131
- 804 **Coupel-Ledru A, Lebon E, Christophe A, Gallo A, Gago P, Pantin F, Doligez A,**  
805 **Simonneau T** (2016) Reduced nighttime transpiration is a relevant breeding



- 806 target for high water-use efficiency in grapevine. Proc Natl Acad Sci **113**:  
807 8963–8968
- 808 **Davies WJ, Bennett MJ** (2015) Achieving more crop per drop. Nat Plants **1**: 15118
- 809 **Des Marais DL, Hernandez KM, Juenger TE** (2013) Genotype-by-Environment  
810 Interaction and Plasticity: Exploring Genomic Responses of Plants to the  
811 Abiotic Environment. Annu Rev Ecol Evol Syst **44**: 5–29
- 812 **Des Marais DL, Razzaque S, Hernandez KM, Garvin DF, Juenger TE** (2016)  
813 Quantitative trait loci associated with natural diversity in water-use  
814 efficiency and response to soil drying in *Brachypodium distachyon*. Plant Sci  
815 **251**: 2–11
- 816 **Devos KM, Wang ZM, Beales J, Sasaki T, Gale MD** (1998) Comparative genetic  
817 maps of foxtail millet (*Setaria italica*) and rice (*Oryza sativa*). Theor Appl  
818 Genet **96**: 63–68
- 819 **Easlon HM, Nemali KS, Richards JH, Hanson DT, Juenger TE, McKay JK** (2014)  
820 The physiological basis for genetic variation in water use efficiency and  
821 carbon isotope composition in *Arabidopsis thaliana*. Photosynth Res **119**:  
822 119–129
- 823 **Edwards CE, Ewers BE, McClung CR, Lou P, Weinig C** (2012) Quantitative  
824 Variation in Water-Use Efficiency across Water Regimes and Its Relationship  
825 with Circadian, Vegetative, Reproductive, and Leaf Gas-Exchange Traits. Mol  
826 Plant **5**: 653–668
- 827 **Ellsworth PZ, Ellsworth PV, Cousins AB** (2017) Relationship of leaf oxygen and  
828 carbon isotopic composition with transpiration efficiency in the C4 grasses  
829 *Setaria viridis* and *Setaria italica*. J Exp Bot **68**: 3513–3528
- 830 **Escalona JM, Tomàs M, Martorell S, Medrano H, Ribas-Carbo M, Flexas J** (2012)  
831 Carbon balance in grapevines under different soil water supply: importance  
832 of whole plant respiration: Carbon balance in grapevine. Aust J Grape Wine  
833 Res **18**: 308–318
- 834 **Evans RG, Sadler EJ** (2008) Methods and technologies to improve efficiency of  
835 water use: INCREASING WATER USE EFFICIENCIES. Water Resour Res. doi:  
836 10.1029/2007WR006200
- 837 **Fahlgren N, Feldman M, Gehan MA, Wilson MS, Shyu C, Bryant DW, Hill ST,**  
838 **McEntee CJ, Warnasooriya SN, Kumar I, et al** (2015) A Versatile  
839 Phenotyping System and Analytics Platform Reveals Diverse Temporal  
840 Responses to Water Availability in *Setaria*. Mol Plant **8**: 1520–1535



- 841 **Farquhar GD, Hubick KT, Condon AG, Richards RA** (1989) Carbon Isotope  
842 Fractionation and Plant Water-Use Efficiency. *In* PW Rundel, JR Ehleringer,  
843 KA Nagy, eds, *Stable Isot. Ecol. Res.* Springer New York, New York, NY, pp 21–  
844 40
- 845 **Feldman MJ, Paul RE, Banan D, Barrett JF, Sebastian J, Yee M-C, Jiang H, Lipka**  
846 **AE, Brutnell TP, Dinneny JR, et al** (2017) Time dependent genetic analysis  
847 links field and controlled environment phenotypes in the model C4 grass  
848 *Setaria*. *PLoS Genet* **13**: e1006841
- 849 **Fleury D, Jefferies S, Kuchel H, Langridge P** (2010) Genetic and genomic tools to  
850 improve drought tolerance in wheat. *J Exp Bot* **61**: 3211–3222
- 851 **Flood PJ, Harbinson J, Aarts MGM** (2011) Natural genetic variation in plant  
852 photosynthesis. *Trends Plant Sci* **16**: 327–335
- 853 **Franks PJ, Farquhar GD** (2006) The Mechanical Diversity of Stomata and Its  
854 Significance in Gas-Exchange Control. *PLANT Physiol* **143**: 78–87
- 855 **Ge Y, Bai G, Stoerger V, Schnable JC** (2016) Temporal dynamics of maize plant  
856 growth, water use, and leaf water content using automated high throughput  
857 RGB and hyperspectral imaging. *Comput Electron Agric* **127**: 625–632
- 858 **Golzarian MR, Frick RA, Rajendran K, Berger B, Roy S, Tester M, Lun DS** (2011)  
859 Accurate inference of shoot biomass from high-throughput images of cereal  
860 plants. *Plant Methods* **7**: 2
- 861 **Granier C, Aguirrezabal L, Chenu K, Cookson SJ, Dauzat M, Hamard P, Thioux J-**  
862 **J, Rolland G, Bouchier-Combaud S, Lebaudy A, et al** (2006) PHENOPSIS, an  
863 automated platform for reproducible phenotyping of plant responses to soil  
864 water deficit in *Arabidopsis thaliana* permitted the identification of an  
865 accession with low sensitivity to soil water deficit. *New Phytol* **169**: 623–635
- 866 **Gregory PJ, George TS** (2011) Feeding nine billion: the challenge to sustainable  
867 crop production. *J Exp Bot* **62**: 5233–5239
- 868 **Halperin O, Gebremedhin A, Wallach R, Moshelion M** (2017) High-throughput  
869 physiological phenotyping and screening system for the characterization of  
870 plant-environment interactions. *Plant J* **89**: 839–850
- 871 **Hamdy A, Ragab R, Scarascia-Mugnozza E** (2003) Coping with water scarcity:  
872 water saving and increasing water productivity. *Irrig Drain* **52**: 3–20
- 873 **Hetherington AM, Woodward FI** (2003) The role of stomata in sensing and driving  
874 environmental change. *Nature* **424**: 901–908

- 875 **Holloway-Phillips M-M, Brodribb TJ** (2011) Contrasting hydraulic regulation in  
876 closely related forage grasses: implications for plant water use. *Funct Plant*  
877 *Biol* **38**: 594
- 878 **Honsdorf N, March TJ, Berger B, Tester M, Pillen K** (2014) High-Throughput  
879 Phenotyping to Detect Drought Tolerance QTL in Wild Barley Introgression  
880 Lines. *PLoS ONE* **9**: e97047
- 881 **Huang P, Shyu C, Coelho CP, Cao Y, Brutnell TP** (2016) *Setaria viridis* as a Model  
882 System to Advance Millet Genetics and Genomics. *Front Plant Sci.* doi:  
883 10.3389/fpls.2016.01781
- 884 **Huxman TE, Smith MD, Fay PA, Knapp AK, Shaw MR, Loik ME, Smith SD, Tissue**  
885 **DT, Zak JC, Weltzin JF, et al** (2004) Convergence across biomes to a  
886 common rain-use efficiency. *Nature* **429**: 651–654
- 887 **Kenney AM, McKay JK, Richards JH, Juenger TE** (2014) Direct and indirect  
888 selection on flowering time, water-use efficiency (WUE,  $\delta^{13}C$ ), and WUE  
889 plasticity to drought in *Arabidopsis thaliana*. *Ecol Evol* **4**: 4505–4521
- 890 **Kwak I-Y, Moore CR, Spalding EP, Broman KW** (2016) Mapping Quantitative Trait  
891 Loci Underlying Function-Valued Traits Using Functional Principal  
892 Component Analysis and Multi-Trait Mapping. *G3* **6**: 79–86  
893 *GenesGenomesGenetics* **6**: 79–86
- 894 **Lawson T, Blatt MR** (2014) Stomatal Size, Speed, and Responsiveness Impact on  
895 Photosynthesis and Water Use Efficiency. *PLANT Physiol* **164**: 1556–1570
- 896 **Lawson T, von Caemmerer S, Baroli I** (2010) Photosynthesis and Stomatal  
897 Behaviour. *In* UE Lüttge, W Beyschlag, B Büdel, D Francis, eds, *Prog. Bot.* 72.  
898 Springer Berlin Heidelberg, Berlin, Heidelberg, pp 265–304
- 899 **Lawson T, Kramer DM, Raines CA** (2012) Improving yield by exploiting  
900 mechanisms underlying natural variation of photosynthesis. *Curr Opin*  
901 *Biotechnol* **23**: 215–220
- 902 **Legendre P** (2014) lmodel2: Model II Regression. R package version 1.7-2.
- 903 **Li P, Brutnell TP** (2011) *Setaria viridis* and *Setaria italica*, model genetic systems  
904 for the Panicoid grasses. *J Exp Bot* **62**: 3031–3037
- 905 **Lopez G, Pallas B, Martinez S, Lauri P-É, Regnard J-L, Durel C-É, Costes E** (2015)  
906 Genetic Variation of Morphological Traits and Transpiration in an Apple Core  
907 Collection under Well-Watered Conditions: Towards the Identification of  
908 Morphotypes with High Water Use Efficiency. *PLoS ONE* **10**: e0145540

- 909 **Lowry DB, Logan TL, Santuari L, Hardtke CS, Richards JH, DeRose-Wilson LJ,**  
910 **McKay JK, Sen S, Juenger TE** (2013) Expression Quantitative Trait Locus  
911 Mapping across Water Availability Environments Reveals Contrasting  
912 Associations with Genomic Features in Arabidopsis. *Plant Cell* **25**: 3266–  
913 3279
- 914 **Martre P, Cochard H, Durand J-L** (2001) Hydraulic architecture and water flow in  
915 growing grass tillers (*Festuca arundinacea* Schreb.). *Plant Cell Environ* **24**:  
916 65–76
- 917 **Mauro-Herrera M, Doust AN** (2016) Development and Genetic Control of Plant  
918 Architecture and Biomass in the Panicoid Grass, *Setaria*. *PLOS ONE* **11**:  
919 e0151346
- 920 **Mojica JP, Mullen J, Lovell JT, Monroe JG, Paul JR, Oakley CG, McKay JK** (2016)  
921 Genetics of water use physiology in locally adapted *Arabidopsis thaliana*.  
922 *Plant Sci* **251**: 12–22
- 923 **Monteith JL** (1993) The exchange of water and carbon by crops in a mediterranean  
924 climate. *Irrig Sci*. doi: 10.1007/BF00208401
- 925 **Morison JI, Baker N, Mullineaux P, Davies W.** (2008) Improving water use in  
926 crop production. *Philos Trans R Soc B Biol Sci* **363**: 639–658
- 927 **Nakhforoosh A, Bodewein T, Fiorani F, Bodner G** (2016) Identification of Water  
928 Use Strategies at Early Growth Stages in Durum Wheat from Shoot  
929 Phenotyping and Physiological Measurements. *Front Plant Sci*. doi:  
930 10.3389/fpls.2016.01155
- 931 **Parent B, Shahinnia F, Maphosa L, Berger B, Rabie H, Chalmers K, Kovalchuk A,**  
932 **Langridge P, Fleury D** (2015) Combining field performance with controlled  
933 environment plant imaging to identify the genetic control of growth and  
934 transpiration underlying yield response to water-deficit stress in wheat. *J*  
935 *Exp Bot* **66**: 5481–5492
- 936 **Pater D, Mullen JL, McKay JK, Schroeder JI** (2017) Screening for Natural Variation  
937 in Water Use Efficiency Traits in a Diversity Set of *Brassica napus* L. Identifies  
938 Candidate Variants in Photosynthetic Assimilation. *Plant Cell Physiol* **58**:  
939 1700–1709
- 940 **Penman H, Schofield R** (1951) Some physical aspects of assimilation and  
941 transpiration. *Carbon Dioxide Fixat. Photosynth.* 5:
- 942 **Pereyra-Irujo GA, Gasco ED, Peirone LS, Aguirrezábal LAN** (2012) GlyPh: a low-  
943 cost platform for phenotyping plant growth and water use. *Funct Plant Biol*  
944 **39**: 905

- 945 **Premachandra GS, Hahn DT, Axtell JD, Joly RJ** (1994) Epicuticular wax load and  
946 water-use efficiency in bloomless and sparse-bloom mutants of Sorghum  
947 bicolor L. *Environ Exp Bot* **34**: 293–301
- 948 **Reuzeau C, Frankard V, Hatzfeld Y, Sanz A, Van Camp W, Lejeune P, De Wilde C,**  
949 **Lievens K, de Wolf J, Vranken E, et al** (2006) Traitmill™: a functional  
950 genomics platform for the phenotypic analysis of cereals. *Plant Genet Resour*  
951 *Charact Util* **4**: 20–24
- 952 **Ruggiero A, Punzo P, Landi S, Costa A, Van Oosten M, Grillo S** (2017) Improving  
953 Plant Water Use Efficiency through Molecular Genetics. *Horticulturae* **3**: 31
- 954 **Ryan AC, Dodd IC, Rothwell SA, Jones R, Tardieu F, Draye X, Davies WJ** (2016)  
955 Gravimetric phenotyping of whole plant transpiration responses to  
956 atmospheric vapour pressure deficit identifies genotypic variation in water  
957 use efficiency. *Plant Sci* **251**: 101–109
- 958 **Sack L, Holbrook NM** (2006) LEAF HYDRAULICS. *Annu Rev Plant Biol* **57**: 361–381
- 959 **Sadok W, Naudin P, Boussuge B, Muller B, Welcker C, Tardieu F** (2007) Leaf  
960 growth rate per unit thermal time follows QTL-dependent daily patterns in  
961 hundreds of maize lines under naturally fluctuating conditions. *Plant Cell*  
962 *Environ* **30**: 135–146
- 963 **Saha P, Sade N, Arzani A, Rubio Wilhelmi M del M, Coe KM, Li B, Blumwald E**  
964 (2016) Effects of abiotic stress on physiological plasticity and water use of  
965 *Setaria viridis* (L.). *Plant Sci* **251**: 128–138
- 966 **Schoppach R, Taylor JD, Majerus E, Claverie E, Baumann U, Suchecki R, Fleury**  
967 **D, Sadok W** (2016) High resolution mapping of traits related to whole-plant  
968 transpiration under increasing evaporative demand in wheat. *J Exp Bot* **67**:  
969 2847–2860
- 970 **Seibt U, Rajabi A, Griffiths H, Berry JA** (2008) Carbon isotopes and water use  
971 efficiency: sense and sensitivity. *Oecologia* **155**: 441–454
- 972 **Stanhill G** (1986) Water Use Efficiency. *Adv. Agron.* Elsevier, pp 53–85
- 973 **Stewart G, Turnbull M, Schmidt S, Erskine P** (1995)  $^{13}\text{C}$  Natural Abundance in  
974 Plant Communities Along a Rainfall Gradient: a Biological Integrator of Water  
975 Availability. *Aust J Plant Physiol* **22**: 51
- 976 **Tardieu F** (2013) Plant response to environmental conditions: assessing potential  
977 production, water demand, and negative effects of water deficit. *Front*  
978 *Physiol.* doi: 10.3389/fphys.2013.00017

- 979 **Tisné S, Schmalenbach I, Reymond M, Dauzat M, Pervent M, Vile D, Granier C**  
980 (2010) Keep on growing under drought: genetic and developmental bases of  
981 the response of rosette area using a recombinant inbred line population: Leaf  
982 development and drought stress. *Plant Cell Environ* **33**: 1875–1887
- 983 **Tisné S, Serrand Y, Bach L, Gilbault E, Ben Ameer R, Balasse H, Voisin R,**  
984 **Bouchez D, Durand-Tardif M, Guerche P, et al** (2013) Phenoscope: an  
985 automated large-scale phenotyping platform offering high spatial  
986 homogeneity. *Plant J* **74**: 534–544
- 987 **Tomás M, Medrano H, Escalona JM, Martorell S, Pou A, Ribas-Carbó M, Flexas J**  
988 (2014) Variability of water use efficiency in grapevines. *Environ Exp Bot*  
989 **103**: 148–157
- 990 **Vasseur F, Bontpart T, Dauzat M, Granier C, Vile D** (2014) Multivariate genetic  
991 analysis of plant responses to water deficit and high temperature revealed  
992 contrasting adaptive strategies. *J Exp Bot* **65**: 6457–6469
- 993 **Walter A, Scharr H, Gilmer F, Zierer R, Nagel KA, Ernst M, Wiese A, Virnich O,**  
994 **Christ MM, Uhlig B, et al** (2007) Dynamics of seedling growth acclimation  
995 towards altered light conditions can be quantified via GROWSCREEN: a setup  
996 and procedure designed for rapid optical phenotyping of different plant  
997 species. *New Phytol* **174**: 447–455
- 998 **Wang ZM, Devos KM, Liu CJ, Wang RQ, Gale MD** (1998) Construction of RFLP-  
999 based maps of foxtail millet, *Setaria italica* (L.) P. Beauv. *Theor Appl Genet*  
1000 **96**: 31–36
- 1001 **White TA, Snow VO** (2012) A modelling analysis to identify plant traits for  
1002 enhanced water-use efficiency of pasture. *Crop Pasture Sci* **63**: 63
- 1003 **Winter K, Aranda J, Holtum JAM** (2005) Carbon isotope composition and water-  
1004 use efficiency in plants with crassulacean acid metabolism. *Funct Plant Biol*  
1005 **32**: 381
- 1006 **Xu Y, This D, Pausch RC, Vonhof WM, Coburn JR, Comstock JP, McCouch SR**  
1007 (2009) Leaf-level water use efficiency determined by carbon isotope  
1008 discrimination in rice seedlings: genetic variation associated with population  
1009 structure and QTL mapping. *Theor Appl Genet* **118**: 1065–1081
- 1010 **Zegada-Lizarazu W, Iijima M** (2005) Deep Root Water Uptake Ability and Water  
1011 Use Efficiency of Pearl Millet in Comparison to Other Millet Species. *Plant*  
1012 *Prod Sci* **8**: 454–460
- 1013 **Zhou Y, Lambrides CJ, Kearns R, Ye C, Fukai S** (2012) Water use, water use  
1014 efficiency and drought resistance among warm-season turfgrasses in shallow  
1015 soil profiles. *Funct Plant Biol* **39**: 116

1016 **Zhu C, Yang J, Shyu C** (2017) Setaria Comes of Age: Meeting Report on the Second  
1017 International Setaria Genetics Conference. Front Plant Sci. doi:  
1018 10.3389/fpls.2017.01562

1019
